# Supplementary material for: Oxygen heterocycle-fused indacenodithiophenebithiophene enables an efficient non-fullerene molecular acceptor
Source: Royal Society of Chemistry journal article supplement (doi:10.1039/c9tc05041h), 2019-01-01
Supplement: c9tc05041h1.pdf [file c9tc05041h1.pdf]

## Supporting Information

### Oxygen heterocycle-fused indacenodithiophenebithiophene enables efficient non-fullerene molecular acceptor

Chaochao Xia,<sup>a</sup> Hao Wu,<sup>b</sup> Qihui Yue,<sup>b</sup> Shanshan Chen,<sup>c</sup> Lingling Shui,<sup>\*,a</sup> Haijun Fan<sup>\*,b</sup> and Xiaozhang Zhu<sup>\*,b</sup>

<sup>a</sup>Guangdong Provincial Key Laboratory of Optical Information Materials and Technology and Institute of Electronic Paper Displays, South China Academy of Advanced Optoelectronics, South China Normal University, Guangzhou 510006, China

<sup>b</sup>Beijing National Laboratory for Molecular Sciences CAS Key Laboratory of Organic Solids Institute of Chemistry Chinese Academy of Sciences, Beijing 100190, China

<sup>c</sup>MOE Key Laboratory of Low-grade Energy Utilization Technologies and Systems, CQU-NUS Renewable Energy Materials & Devices Joint Laboratory, School of Energy & Power Engineering, Chongqing University, Chongqing 400044, China

<sup>‡</sup>Chaochao Xia and Hao Wu contributed equally to this work.

\* E-mail: [shuill@scnu.edu.cn](mailto:shuill@scnu.edu.cn); [fanhai2008@iccas.ac.cn](mailto:fanhai2008@iccas.ac.cn); [xzzhu@iccas.ac.cn](mailto:xzzhu@iccas.ac.cn)

## Contents

|                                                  |    |
|--------------------------------------------------|----|
| Part 1. Experimental Section.....                | 2  |
| 1.1 Materials and general methods.....           | 2  |
| 1.2 Device fabrication and characterization..... | 2  |
| 1.3 Synthetic details.....                       | 4  |
| Part 2. Figures and Tables.....                  | 9  |
| Part 3. NMR Charts.....                          | 15 |
| Part 4. Mass Spectra.....                        | 26 |

## Part 1. Experimental Section

### 1.1 Materials and general methods

All reactions involving air- or moisture-sensitive compounds were carried out in a dry reaction vessel under a positive pressure of nitrogen. Unless stated otherwise, starting materials were obtained from Adamas, Aldrich or J&K and were used without further purification. Anhydrous THF and toluene were distilled over Na/benzophenone prior to use. Anhydrous DMF was distilled over CaH<sub>2</sub> prior to use. Compounds **1-11** were prepared according to published procedures. <sup>1</sup>H and <sup>13</sup>C NMR spectra were measured with Bruker Avance 400 spectrometers. Chemical shifts for hydrogens are reported in parts per million (ppm, scale) downfield from tetramethylsilane and are referenced to the residual protons in the NMR solvent (CDCl<sub>3</sub>: 7.26). <sup>13</sup>C NMR spectra were recorded at 100 MHz. Chemical shifts for carbons are reported in parts per million (ppm, scale) downfield from tetramethylsilane and are referenced to the carbon resonance of the solvent (CDCl<sub>3</sub>: 77.2). The data are presented as follows: chemical shift, multiplicity (s = singlet, d = doublet, t = triplet, m = multiplet and/or multiple resonances, br = broad), coupling constant in hertz (Hz), and integration. MALDI measurements were performed with a MALDI-FT 9.4 T, Bruker solariX, or MALDI-TOF MS Bruker Autoflex III. UV-vis was recorded with Jasco V-570 spectrometers. Cyclic voltammetry (CV) was performed with a CHI620D potentiostat equipped with a glassy-carbon electrode, a platinum counter-electrode, and an Ag/Ag<sup>+</sup> reference electrode. The supporting electrolyte was a 0.1 mol/L dichloromethane solution of tetrabutylammonium perchlorate (TBAP). The measurement was carried out in a scan rate of 100 mV s<sup>-1</sup> under nitrogen atmosphere. All potentials were corrected against Fc/Fc<sup>+</sup>.

### 1.2 Device fabrication and characterization

Single-junction solar cells were fabricated with an ITO/PEDOT:PSS/active layer/ZnO/Al structure. ITO-coated glass substrates (15 Ω sq<sup>-1</sup>) were cleaned by sequential ultrasonication in soap deionized water, deionized water, acetone, and isopropanol. The washed substrates were further treated with oxygen plasma for 20 min to eliminate any remaining organic component. A thin layer (ca. 30 nm) of PEDOT:PSS was first spin-coated on the ITO substrates at 3,000 r.p.m. and baked at 150 °C for 30 min in air. The substrates were then transferred into a nitrogen-filled glovebox. Subsequently, the active layer was spin-coated on the PEDOT:PSS layer from a chloroform solution of 9 mg ml<sup>-1</sup> PBDB-T and 9 mg ml<sup>-1</sup> IDTODTs at various spin rates. The resulting film thickness was measured

via a surface profilometer (Dektak XT, Bruker). Thermal annealing (TA) was used to optimize the blend morphology and performance. Then, 10 mg ml<sup>-1</sup> ZnO in n-butanol was spin-coated on the active layer. At the final stage, aluminum (100 nm) was thermally evaporated as the top electrode. Shadow masks were used to define the active area to be 0.04 cm<sup>2</sup>.

The current density–voltage (J–V) characteristics of photovoltaic devices were measured under N<sub>2</sub> using a Keithley 2400 source meter. A 300 W xenon arc solar simulator (Oriel) with an AM 1.5 global filter operated at 100 mW cm<sup>-2</sup> was used to simulate the AM 1.5G solar irradiation. The illumination intensity was corrected by using a silicon photodiode with a protective KG5 filter calibrated by the National Renewable Energy Laboratory (NREL). The external quantum efficiency (EQE) was performed using certified IPCE equipment from Enlitech, Taiwan. Space charge-limited currents (SCLCs) were tested in electron-only devices with a configuration of ITO/ZnO/active layer/Al and hole-only devices with a configuration of ITO/PEDOT:PSS/active layer/MoO<sub>3</sub>/Ag. The mobilities were determined by fitting the dark current to the single carrier SCLC model, which is described as

$$J = \frac{9\varepsilon_0\varepsilon_r\mu_0V^2}{8L^3} \quad (1)$$

Where J is the current,  $\mu_0$  is the zero-field mobility,  $\varepsilon_0$  is the permittivity of free space,  $\varepsilon_r$  is the relative permittivity of the material, V is the effective voltage, and L is the thickness of the active layer. From the plots of J<sup>0.5</sup> vs V, hole and electron mobilities can be deduced.

**GIXD characterization:** PLS-II 9A USAXS beam line was employed to perform Grazing incidence X-ray diffraction (GIXD) characterization of the thin films. X-rays coming from the in-vacuum undulator (IVU) were monochromated (wavelength  $\lambda = 1.109\ 94\ \text{\AA}$ ) using a double crystal monochromator and focused both horizontally and vertically (450 (H)  $\times$  60 (V)  $\mu\text{m}^2$  in fwhm at sample position) using K-B type mirrors. GIXD patterns were recorded with a 2D CCD detector (Rayonix SX165), and X-ray irradiation time was 6-9 s, dependent on the saturation level of the detector. Diffraction angles were calibrated using a sucrose standard (monoclinic, P21, a = 10.8631  $\text{\AA}$ , b = 8.7044  $\text{\AA}$ , c = 7.7624  $\text{\AA}$ ,  $\beta = 102.938\ \text{\AA}$ ) and the sample-to-detector distance was ~231 mm.

**Photo-induced force microscopy (PiFM):** The PiFM images were monitored by a microscope from VistaScope, Molecular Vista, Inc., operated in a dynamic mode using commercial gold-coated silicon cantilevers (NCHAu) bought from Nanosensors. The excitation laser is a LaserTune IR Source from Block Engineering.

### 1.3 Synthetic details

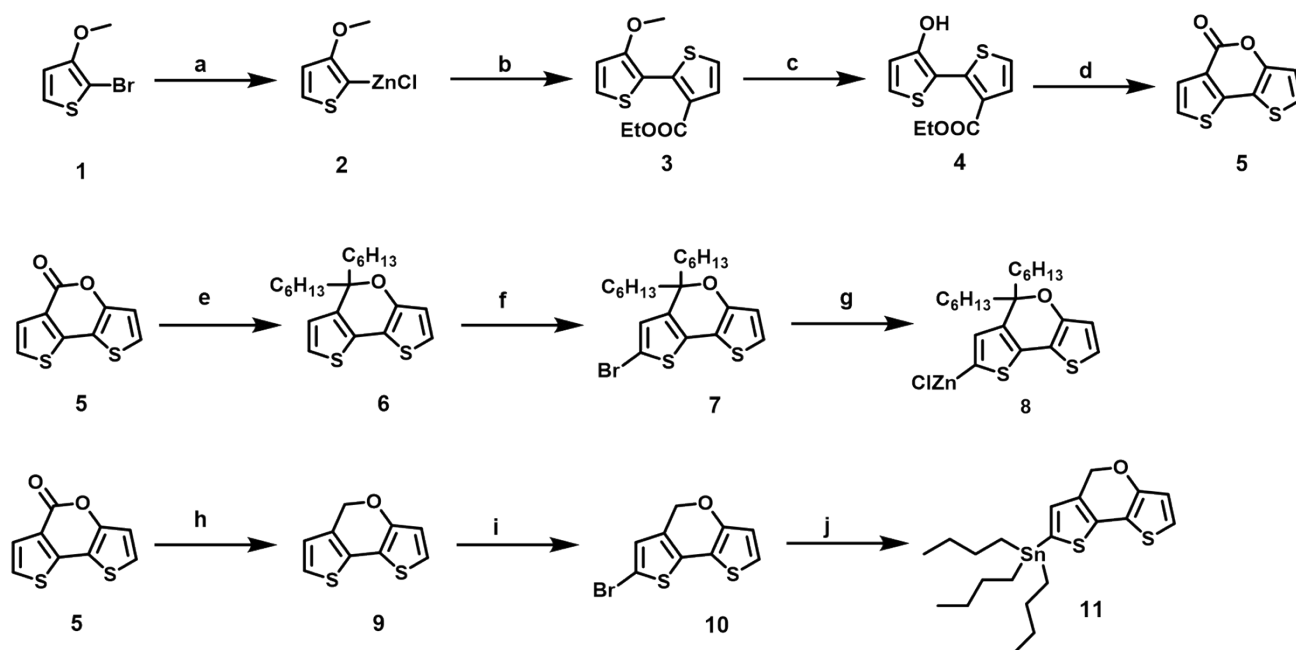

**Scheme S1.** Synthetic routes for precursors 1-12, a): *i*-Pr-MgCl·LiCl, ZnCl<sub>2</sub>, THF; b): 2-bromo-3-methylthiophene, Pd(PPh<sub>3</sub>)<sub>4</sub>, THF; c): BBr<sub>3</sub>, CH<sub>2</sub>Cl<sub>2</sub>; d): *p*-TSOH, Toluene reflux; e): Hexylmagnesium chloride, THF; *p*-TSOH, Toluene, reflux; f) NBS, DMF; g) *i*-Pr-MgCl·LiCl, ZnCl<sub>2</sub> h): BF<sub>3</sub>Et<sub>2</sub>O, NaBH<sub>4</sub>, THF ; i): NBS, DMF; j): *i*-Pr-MgCl·LiCl, Tri-*n*-butyltin chloride, THF.

**Synthesis of Compound-12:** Under nitrogen atmosphere, compounds-12 (970mg, 2.206 mmol) and 2,5-Dibromatephthalic acid diethyl ester 380 mg, 0.94 mmol, 0.45 equiv.) were dissolved in THF, then the Pd(PPh<sub>3</sub>)<sub>4</sub> was added (0.1 equiv). The reaction solution was stirred at 75 °C overnight under nitrogen atmosphere and then extracted with ethyl acetate. The crude product was purified on a silica-gel column chromatography to give 350 mg of compound-17 as an orange solid (38%). <sup>1</sup>H NMR (400 MHz, CDCl<sub>3</sub>): 7.74 (s, 2H), 7.01 (d, 2H), 6.70 (s, 2H), 6.68 (d, 2H), 4.26 (q, 4H), 1.87(m, 8H), 1.41-1.25 (m, 38H), 0.85(m, 12H) ; <sup>13</sup>C NMR(400 MHz, CDCl<sub>3</sub>): δ 167.9, 151.7, 135.6, 133.7, 133.3, 132.5, 131.2, 130.5, 124.6, 121.3, 118.6, 109.7, 86.2, 61.8, 40.0, 31.8, 29.6, 23.8, 22.7, 14.1; HRMS (MALDI-TOF) calcd for C<sub>54</sub>H<sub>70</sub>O<sub>6</sub>S<sub>4</sub> [M]<sup>+</sup> : 942.41, found, 943.39.

**Synthesis of Compound-13:** Under -78°, *n*-BuLi (30 equiv) was slowly added into 1-bromo-4-hexyl-benzene's (30 equiv) solution of THF under N<sub>2</sub>. The result solution was stirred for 0.5h. then compound-16(100mg) was added and stirring for 0.5h, quench with water and extract with dichloromethane, after remove the solvent, the intermediate product was reacted by a ratio of *n*-octane: acetic acid: sulfuric acid= 1000:100:6 without further purification, then extract with

dichloromethane, remove the solvent. The crude product was purified by silica-gel column chromatography to give 90 mg of **compound-17** (yield: 58%). <sup>1</sup>H NMR (400 MHz, CDCl<sub>3</sub>): 7.29(d, 8H), 7.07(d, 8H), 7.01(s, 2H), 6.87(d, 2H), 6.54(d, 2H), 2.55(m, 8H), 1.63(m, 8H), 1.35-0.81(m, 88H); <sup>13</sup>C NMR(400 MHz, CDCl<sub>3</sub>): δ 156.9, 151.2, 151.0, 140.6, 138.4, 137.4, 132.5, 130.9, 128.0, 127.8, 127.0, 119.4, 116.9, 113.3, 109.6, 86.9, 63.0, 40.0, 34.6, 30.8, 30.3, 28.4, 28.3, 22.3, 21.7, 13.1; HRMS (MALDI-TOF) calcd for C<sub>98</sub>H<sub>126</sub>O<sub>2</sub>S<sub>4</sub> [M]<sup>+</sup>: 1463.86, found, 1464.32.

**Synthesis of Compound-14:** Under -78°, n-BuLi (4 equiv) was slowly added into **Compound-17** (50mg) solution of THF under N<sub>2</sub>. The resulting solution was stirred for 1h. then the dry-DMF (10 equiv) was dropped in and stirred for 0.5h, then warm to room temperature and continue stirred for 2 hours, extract with dichloromethane, remove the solvent. The crude product was purified by silica-gel column chromatography to give 27 mg of **compound-17** (52%). <sup>1</sup>H NMR (400 MHz, CDCl<sub>3</sub>): 9.69(s, 2H), 7.24(d, 8H), 7.11(s, 2H), 7.07(d, 8H), 2.56(m, 8H), 1.60(m, 8H), 1.57-0.6(m, 88H); <sup>13</sup>C NMR(400 MHz, CDCl<sub>3</sub>): δ 181.7, 158.5, 152.4, 152.0, 143.2, 142.0, 137.6, 136.0, 133.8, 133.0, 130.6, 128.8, 128.2, 124.4, 122.4, 115.0, 88.4, 64.1, 41.0, 35.6, 31.7, 31.6, 31.3, 29.7, 29.2, 23.2, 22.6, 14.0; HRMS (MALDI-TOF) calcd for C<sub>100</sub>H<sub>126</sub>O<sub>4</sub>S<sub>4</sub> [M]<sup>+</sup>: 1518.85, found, 1520.34.

**Synthesis of IDTODT-1:** Compound-18 (10mg) and 2-(6-fluoro-3-oxo-2,3-dihydro-1H-inden-1-ylidene)malononitrile (5 equiv) were added to a solvent mixture of chloroform (2 mL) and pyridine (1 drops). The reaction was placed in an oil bath at 75° C and was stirred overnight. The mixture was directly purified by silica-gel column chromatography using trichloromethane as eluent to give IDTODT-3 (95%) as blue-black solid. <sup>1</sup>H NMR (400 MHz, CDCl<sub>3</sub>): 8.66(s, 2H), 8.64(m, 0.4H), 8.32(m, 1.6H), 7.86(m, 1.6H), 7.50(m, 0.4H), 7.38(m, 2H), 7.35(m, 2H), 7.27(s, 2H), 7.14(m, 16H), 2.58(m, 8H), 1.61(m, 8H), 1.40-0.68(m, 88H) <sup>13</sup>C NMR(400 MHz, CDCl<sub>3</sub>): δ 187.2, 167.9, 165.3, 159.3, 153.6, 153.2, 147.2, 142.4, 137.1, 136.5, 136.2, 134.3, 133.0, 132.2, 131.4, 130.0, 128.8, 128.4, 125.3, 121.3, 121.0, 120.9, 115.7, 114.7, 112.8, 112.5, 88.8, 68.4, 64.2, 41.3, 35.6, 31.7, 32.2, 29.7, 29.2, 23.2, 22.6, 14.0; HRMS (MALDI-TOF) calcd for C<sub>124</sub>H<sub>132</sub>F<sub>2</sub>N<sub>4</sub>O<sub>4</sub>S<sub>4</sub> [M]<sup>+</sup>: 1906.91, found, 1908.68.

**Synthesis of Compound-15:** Under nitrogen atmosphere, compound-9 (400mg, 2.06 mmol) and 2,5-Dibromatephthalic acid diethyl ester (356 mg, 0.94 mmol, 0.45 equiv.) were dissolved in toluene, after that, Tri(o-toyl)phosphine (0.06 equiv) and Tris(dibenzylideneacetone)dipalladium were added to the solution, respectively. The reagent solution was stirred at 115 °C overnight under nitrogen atmosphere and then extracted with ethyl acetate. The crude product was purified by silica-gel column chromatography to give 450 mg of compound-9 as an orange solid (40%). <sup>1</sup>H

NMR (400 MHz, CDCl<sub>3</sub>): 7.78 (s, 2H), 7.06 (d, 2H), 6.86 (s, 2H), 6.74 (d, 2H), 5.31 (s, 4H), 4.29 (q, 4H), 1.25 (t, 6H); <sup>13</sup>C NMR(400 MHz, CDCl<sub>3</sub>):δ 167.5, 152.2, 136.7, 133.6, 132.6, 131.7, 131.3, 126.9, 123.9, 122.0, 118.3, 118.2, 112.4, 67.6, 61.8, 53.4, 29.7, 13.9; HRMS (MALDI-TOF) calcd for C<sub>30</sub>H<sub>21</sub>O<sub>6</sub>S<sub>4</sub> [M]<sup>+</sup>: 606.03, found, 606.74.

**Synthesis of Compound-16 (IDTODT-2):** Under -78°, n-BuLi (30 equiv) was slowly added into 1-bromo-4-hexyl-benzene's (30 equiv) solution of THF under N<sub>2</sub>. The result solution was stirred for 0.5h. then compound-13(100mg) was added and stirring for 0.5h, quench with water and extract with dichloromethane, after remove the solvent, the intermediate product was reacted by a ratio of n-octane: acetic acid: sulfuric acid= 1000:100:6 without further purification, then extract with dichloromethane, remove the solvent. The crude product was purified by silica-gel column chromatography to give 97 mg of **compound-14 (IDTODT-2, yield: 52%)**. <sup>1</sup>H NMR (400 MHz, CDCl<sub>3</sub>): 7.74 (s, 2H), 7.01 (d, 2H), 6.70 (s, 2H), 6.68 (d, 2H), 4.26 (q, 4H), 1.87(m, 8H), 1.41-1.25 (m, 38H), 0.85(m, 12H); <sup>13</sup>C NMR(400 MHz, CDCl<sub>3</sub>):δ 167.9, 151.7, 135.6, 133.7, 133.3, 132.5, 131.2, 130.5, 124.6, 121.3, 118.6, 109.7, 86.2, 61.8, 40.0, 31.8, 29.6, 23.8, 22.7, 14.1; HRMS (MALDI-TOF) calcd for C<sub>74</sub>H<sub>78</sub>O<sub>2</sub>S<sub>4</sub> [M]<sup>+</sup>: 1126.48, found, 1127.68.

**Synthesis of Compound-16 (IDTODT-3):** Under -78°, n-BuLi (30 equiv) was slowly added into 1-bromo-4-(2-ethylhexyl) benzene's (30 equiv) solution of THF under N<sub>2</sub>. The result solution was stirred for 0.5h. then compound-13(100mg) was added and stirring for 0.5h, quench with water and extract with dichloromethane, after remove the solvent, the intermediate product was reacted by a ratio of n-octane: acetic acid: sulfuric acid= 1000:100:6 without further purification, then extract with dichloromethane, remove the solvent. The crude product was purified by silica-gel column chromatography to give 108 mg of **compound-14 (IDTODT-3, yield: 53%)**. <sup>1</sup>H NMR (400 MHz, CDCl<sub>3</sub>): 7.30(s, 2H), 7.15(d, 8H), 6.95(d, 8H), 6.64(s, 2H), 5.02(s, 4H), 2.49(d, 8H), 1.27(m, 34H), 0.86(m, 26H); <sup>13</sup>C NMR(400 MHz, CDCl<sub>3</sub>):δ 154.5, 152.2, 140.8, 139.8, 138.1, 135.2, 132.0, 129.3, 127.8, 122.4, 120.9, 118.2, 115.8, 133.4, 67.3, 62.9, 40.8, 39.7, 32.4, 29.7, 28.9, 25.5, 23.0, 14.1, 10.8; HRMS (MALDI-TOF) calcd for C<sub>82</sub>H<sub>94</sub>O<sub>2</sub>S<sub>4</sub> [M]<sup>+</sup>: 1238.61 found, 1239.89.

**Synthesis of Compound-17 (IDTODT-2):** Under -78°, n-BuLi (4 equiv) was slowly added into **Compound-14 (IDTODT-2)** (40mg) solution of THF under N<sub>2</sub>. The result solution was stirred for 1h. then the dry-DMF (10 equiv) was dropped in and stirred for 0.5h, then warm to room temperature and continue stirred for 2 hours, extract with dichloromethane, remove the solvent. The crude product was purified by silica-gel column chromatography to give 23 mg of **compound-15 (IDTODT-2, yield: 50%)**: <sup>1</sup>H NMR (400 MHz, CDCl<sub>3</sub>): 9.74 (s, 2H), 7.36(s,2H), 7.22(s, 2H),

7.12(m,16H), 5.09(s, 4H), 2.58(m, 8H), 1.60-0.85 (m, 44H); <sup>13</sup>C NMR(400 MHz, CDCl<sub>3</sub>):δ 181.6, 155.2, 152.6, 151.0, 142.3, 141.8, 139.1, 136.3, 135.4, 130.6, 128.7, 127.8, 126.3, 124.9, 124.4, 116.5, 67.2, 63.0, 53.4, 35.5, 31.7, 31.2, 29.7, 29.1, 22.6, 14.1; HRMS (MALDI-TOF) calcd for C<sub>76</sub>H<sub>78</sub>O<sub>4</sub>S<sub>4</sub> [M]<sup>+</sup> : 1182.47, found, 1183.70.

**Synthesis of Compound-17 (IDTODT-3):** Under - 78°, n-BuLi (4 equiv) was slowly added into **Compound-14 (IDTODT-3)** (40mg) solution of THF under N<sub>2</sub>, The result solution was stirred for 1h. then the dry-DMF (10 equiv)was dropped in and stirred for 0.5h, then warm to room temperature and continue stirred for 2 hours, extract with dichloromethane, remove the solvent. The crude product was purified by silica-gel column chromatography to give 20 mg of **compound-15 (IDTODT-3, yield: 48%)**: <sup>1</sup>H NMR (400 MHz, CDCl<sub>3</sub>): 9.73(s, 2H), 7.37(s, 2H), 7.22(s, 2H), 7.12(d, 8H), 7.07(d, 8H), 5.08(s, 4H), 2.5(m, 8H), 1.27-0.85(m, 60H), <sup>13</sup>C NMR(400 MHz, CDCl<sub>3</sub>):δ 181.7, 155.2, 151.0, 141.8, 141.2, 139.0, 136.2, 135.5, 130.6, 129.5, 127.6, 126.3, 124.9, 124.5, 116.5, 67.2, 63.0, 40.8, 39.7, 32.4, 29.7, 28.8, 25.5, 23.0, 14.1, 10.8; HRMS (MALDI-TOF) calcd for C<sub>84</sub>H<sub>94</sub>O<sub>4</sub>S<sub>4</sub> [M]<sup>+</sup> : 1294.60, found, 1295.91.

**Synthesis of IDTODT-2:** Compound-15 (IDTODT-2) (10mg) and 2-(6-fluoro-3-oxo-2,3-dihydro-1H-inden-1-ylidene)malononitrile (5 equiv) were added to a solvent mixture of chloroform (2 mL) and pyridine (1 drops). The reaction was placed in an oil bath at 75° C and was stirred overnight. The mixture was directly purified by silica-gel column chromatography using trichloromethane as eluent to give IDTODT-2 (95%) as blue-black solid. <sup>1</sup>H NMR (400 MHz, CDCl<sub>3</sub>):8.69(s, 2H), 8.66(m, 0.4H), 8.34(d, 1.6H), 7.88(m, 1.6H), 7.52(m, 0.4H), 7.44(s, 2H), 7.38(m, 2H), 7.29(m, 2H), 7.15(m, 16H), 5.15(s, 4H), 2.59(m, 8H), 1.61(m, 8H), 1.34-0.88(m, 36H) ;<sup>13</sup>C NMR(400 MHz, CDCl<sub>3</sub>):δ 186.2, 166.9, 164.4, 157.6, 155.2, 152.4, 151.1, 144.4, 141.4, 140.6, 137.4, 135.6, 135.0, 133.0, 132.8, 132.0, 130.9, 130.2, 129.8, 128.6, 128.1, 126.6, 124.6, 124.5, 120.5, 116.1, 113.5, 111.8, 111.6, 68.1, 66.4, 62.0, 39.8, 38.7, 31.4, 28.7, 27.8, 24.5, 22.0, 21.7, 13.1, 9.75; HRMS (MALDI-TOF) calcd for C<sub>100</sub>H<sub>84</sub>F<sub>2</sub>N<sub>4</sub>O<sub>4</sub>S<sub>4</sub> [M]<sup>+</sup>: 1570.54, found, 1572.03.

**Synthesis of IDTODT-3:** Compound-15 (IDTODT-3) (10mg) and 2-(6-fluoro-3-oxo-2,3-dihydro-1H-inden-1-ylidene)malononitrile (5 equiv) were added to a solvent mixture of chloroform (2 mL) and pyridine (1 drops). The reaction was placed in an oil bath at 75° C and was stirred overnight. The mixture was directly purified by silica-gel column chromatography using trichloromethane as eluent to give IDTODT-3 (95%) as blue-black solid. <sup>1</sup>H NMR (400 MHz, CDCl<sub>3</sub>): 8.68(s, 2H), 8.65(m, 0.4H), 8.33(d, 1.6H), 7.87(m, 1.6H), 7.50(m, 0.4H), 7.46(s, 2H), 7.37(m, 2H), 7.27(m, 2H), 7.14(m, 16H), 5.14(s, 4H), 2.53(m, 8H), 1.57-0.86(m, 60H); <sup>13</sup>C NMR(400 MHz, CDCl<sub>3</sub>):δ 186.2, 166.9,

164.4, 157.6, 155.2, 152.4, 151.1, 144.4, 141.4, 140.5, 137.4, 135.6, 135.0, 133.0, 132.8, 132.0, 130.9, 130.2, 129.8, 128.6, 128.1, 126.6, 124.6, 120.5, 116.1, 113.5, 111.8, 111.6, 68.1, 66.4, 62.0, 39.8, 38.7, 31.4, 28.7, 27.8, 24.5, 22.0, 21.7, 13.1, 9.8; HRMS (MALDI-TOF) calcd for  $C_{108}H_{100}F_2N_4O_4S_4[M]^+$  : 1682.66, found, 1684.25.



## Part 2. Figures and Tables

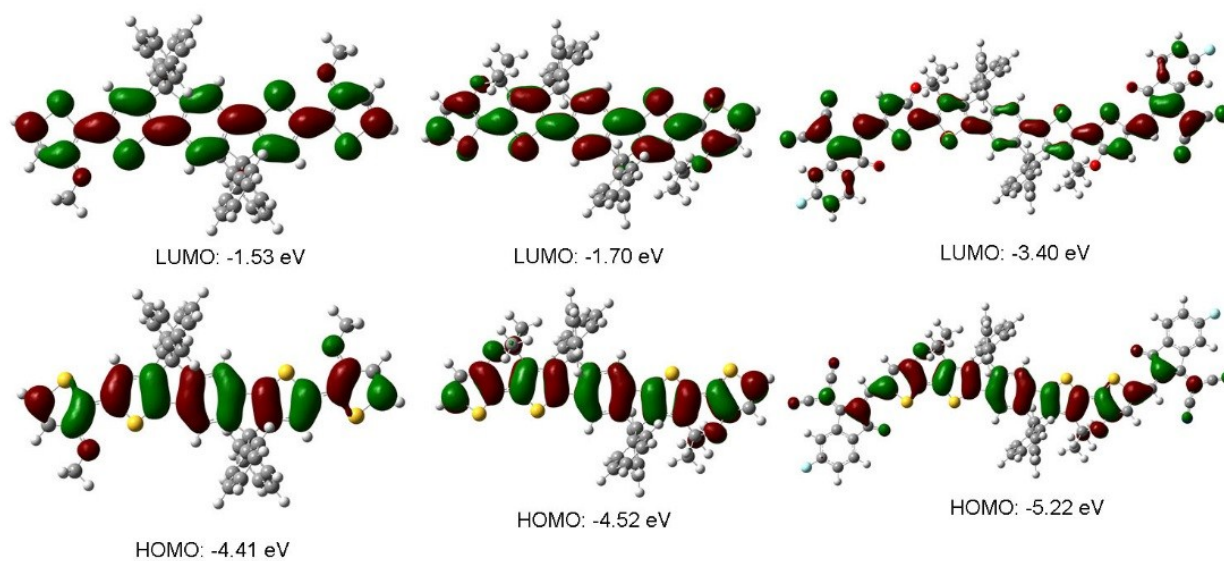

**Fig. S1** Theoretical calculation for IDTDT (left), IDTODT core (middle) and IDTODT NFAs (right) at the DFT B3LYP/6-31G (d) level with the Gaussian 03 program package. All substituents have been replaced by methyl groups to simplify the calculation.

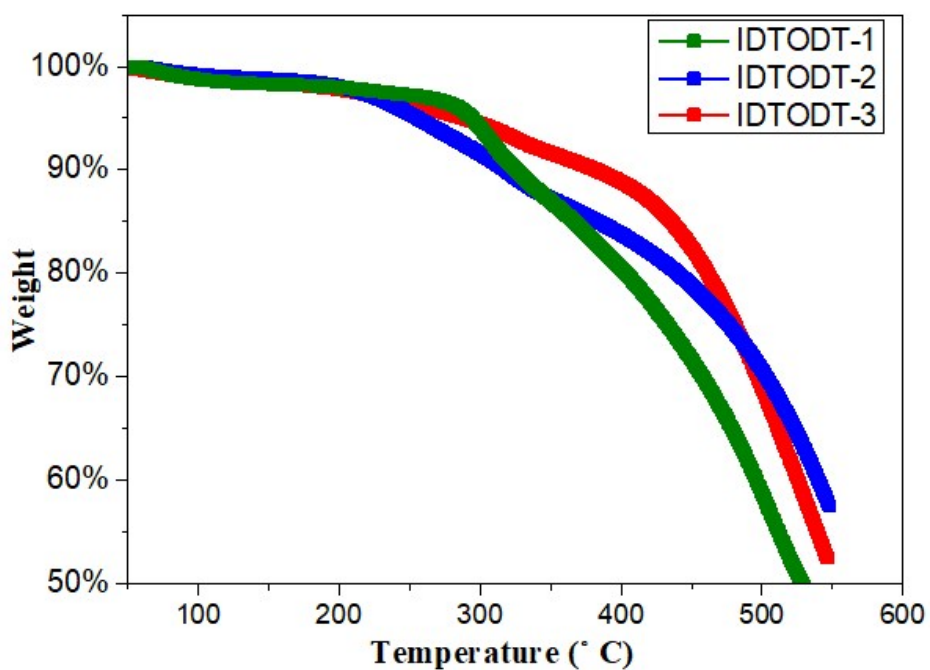

**Fig. S2** TGA of IDTODT-1, IDTODT-2, IDTODT-3.

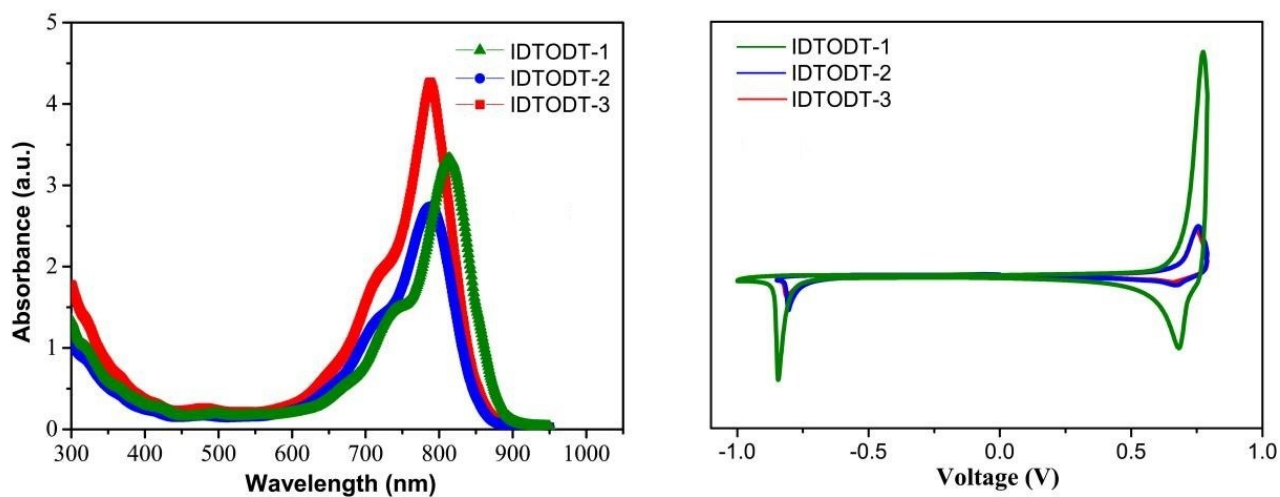

**Fig. S3** (a) Absorption spectra of **IDTODT-1**, **IDTODT-2**, **IDTODT-3** in solution; (b) Cyclic voltammetry of **IDTODT-1**, **IDTODT-2** and **IDTODT-3** as thin films in CH<sub>3</sub>CN/0.1 M [n-Bu<sub>4</sub>N]<sup>+</sup>[PF<sub>6</sub>]<sup>-</sup> at a scan rate of 0.1 V/s.

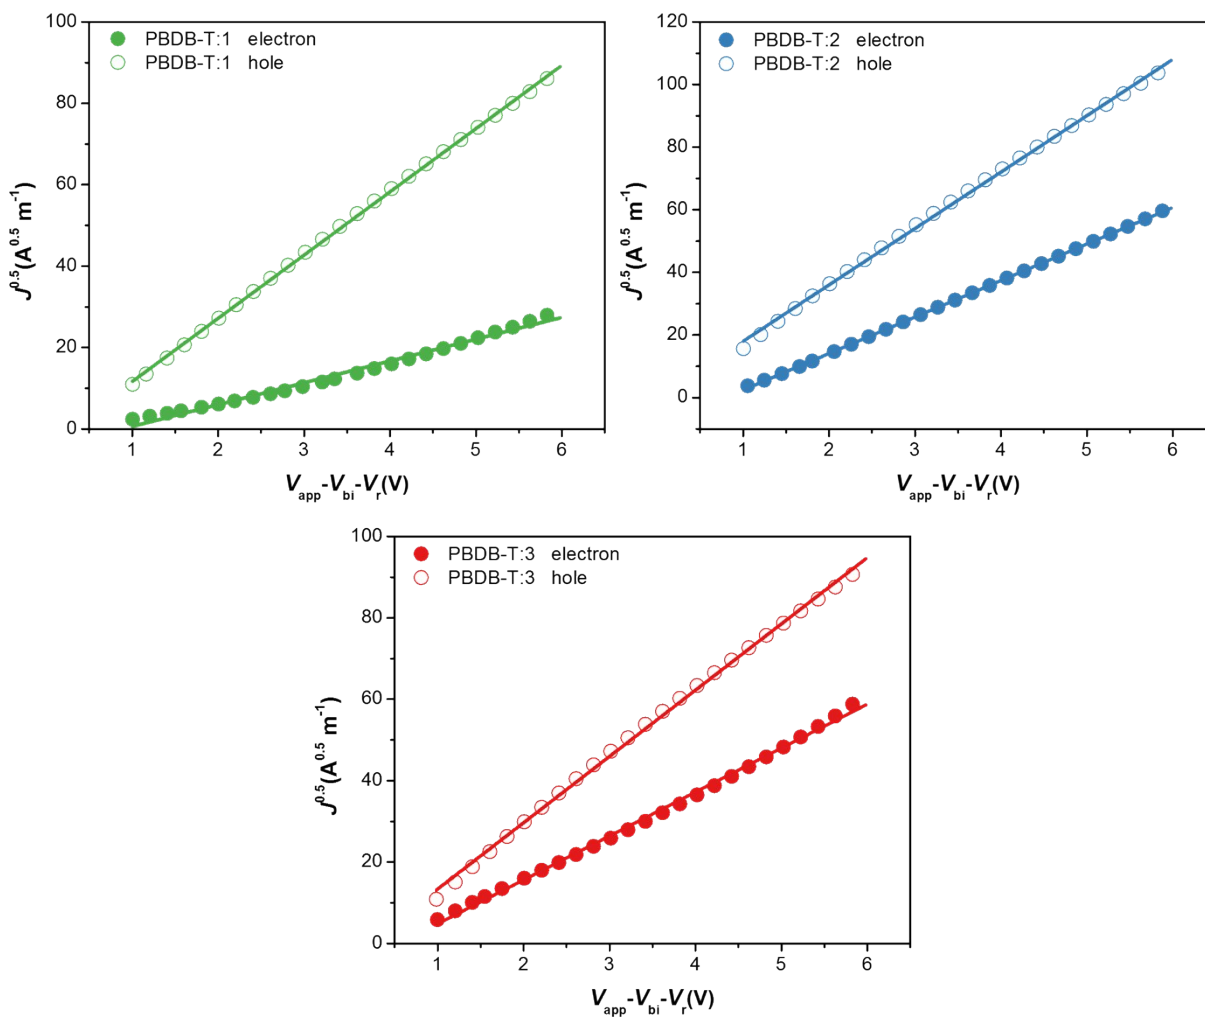

**Fig. S4** Space-charge-limited-current test of **IDTODT-1**, **IDTODT-2**, **IDTODT-3**

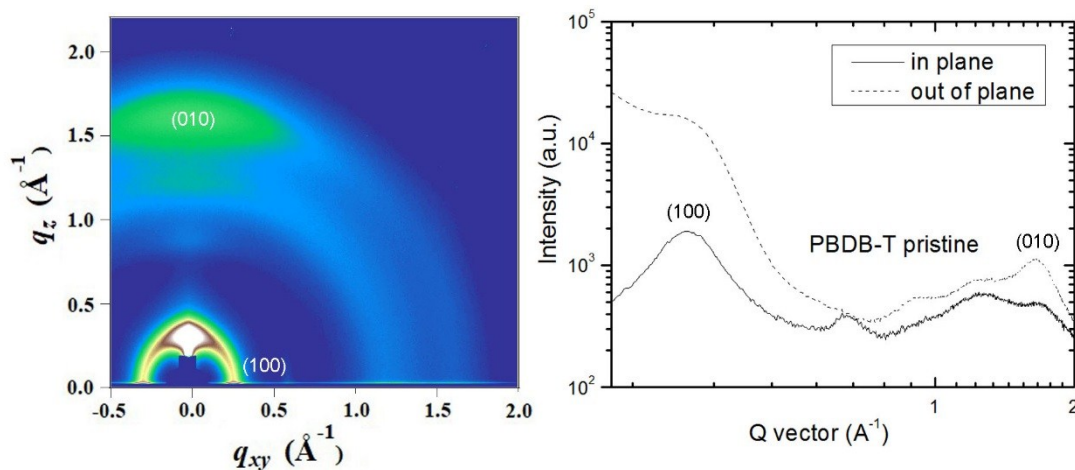

**Fig. S5** 2D GIXS images (left) and corresponding line-cuts (right) of PBDB-T pristine film.

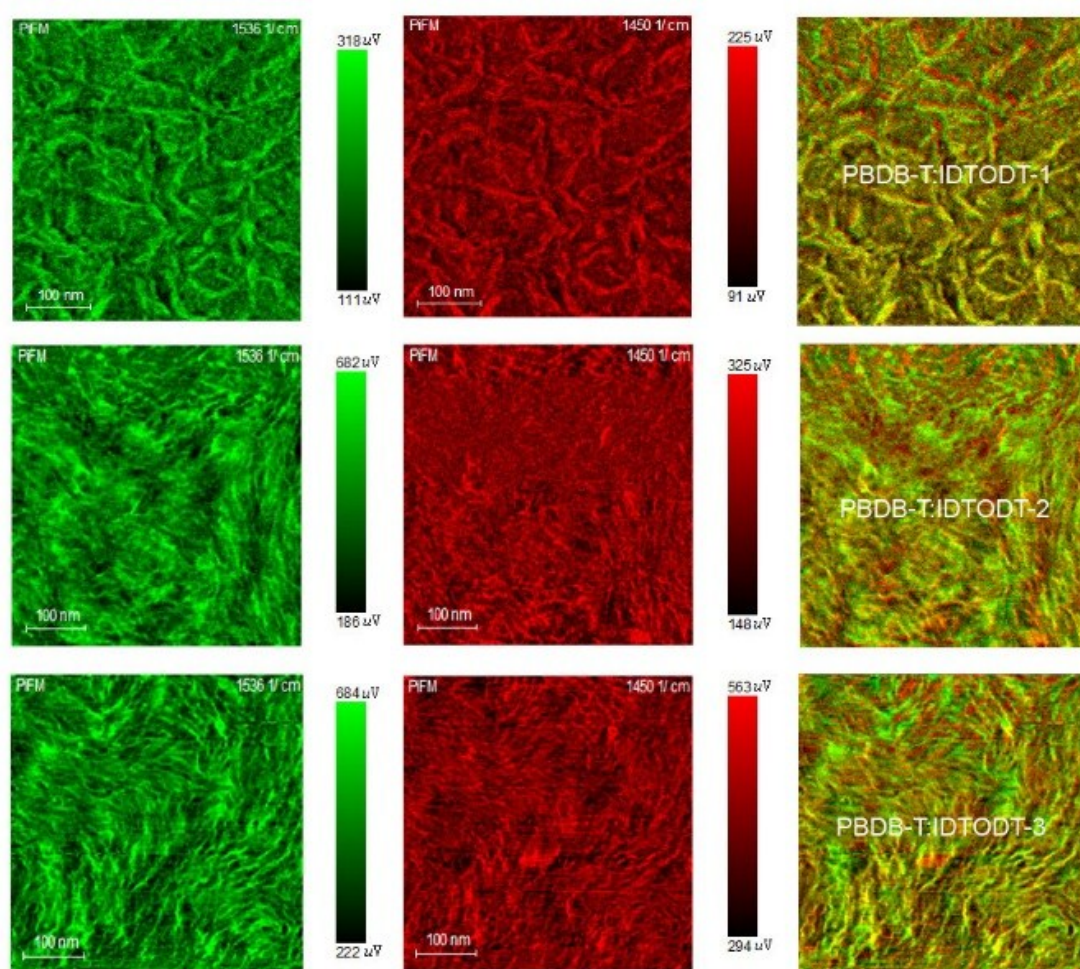

**Fig. S6** PiFM images of PBDB-T:IDTODT blends. Left column: images probed at  $\sim 1536 \text{ cm}^{-1}$  reflecting the characteristic response of IDTODT acceptors (painted in green). Middle column: images probed at  $\sim 1450 \text{ cm}^{-1}$  reflecting the characteristic response of PBDB-T donor (painted in red). Right column: combined images mapping the donor- and acceptor-rich phases.

**Table S1** Photovoltaic parameters of solar cells based on PBDB-T:IDTODT-1 at 1:1 weight ratio with thermal annealing for 10 minutes, under the irradiation of AM 1.5G, 100 mW cm<sup>-2</sup>.

| Treatment | $V_{oc}$<br>[V] | $J_{sc}$<br>[mA cm <sup>-2</sup> ] | $FF$<br>[%] | $PCE$<br>[%] |
|-----------|-----------------|------------------------------------|-------------|--------------|
| as-cast   | 0.829           | 13.63                              | 51.91       | 5.87         |
| 100       | 0.810           | 13.98                              | 55.32       | 6.26         |
| 120       | 0.802           | 14.49                              | 59.10       | 6.87         |
| 140       | 0.780           | 11.91                              | 57.78       | 5.37         |

**Table S2.** Effect of the active layer thickness on the device performance parameters for the OPVs based on PBDB-T:IDTODT-1 at 1:1 weight ratio with thermal annealing at 130°C for 10 minutes, under the irradiation of AM 1.5G, 100 mW cm<sup>-2</sup>.

| Thickness<br>[nm] | $V_{oc}$<br>[V] | $J_{sc}$<br>[mA cm <sup>-2</sup> ] | $FF$<br>[%] | $PCE$<br>[%] |
|-------------------|-----------------|------------------------------------|-------------|--------------|
| 90                | 0.802           | 14.03                              | 59.87       | 6.74         |
| 110               | 0.802           | 14.49                              | 59.10       | 6.87         |
| 125               | 0.799           | 14.87                              | 56.21       | 6.68         |

**Table S3.** The device performance parameters for the OPVs based on PBDB-T:IDTODT-2 at 1:1 weight ratio with thermal annealing for 10 minutes, under the irradiation of AM 1.5G, 100 mW cm<sup>-2</sup>.

| Treatment | $V_{oc}$<br>[V] | $J_{sc}$<br>[mA cm <sup>-2</sup> ] | $FF$<br>[%] | $PCE$<br>[%] |
|-----------|-----------------|------------------------------------|-------------|--------------|
| as-cast   | 0.793           | 12.60                              | 54.46       | 5.44         |
| 120       | 0.782           | 14.43                              | 59.97       | 6.77         |
| 140       | 0.770           | 15.28                              | 59.25       | 6.99         |
| 160       | 0.767           | 13.55                              | 52.47       | 5.46         |

**Table S4.** Effect of the active layer thickness on the device performance parameters for the OPVs based on PBDB-T:IDTODT-2 at 1:1 weight ratio with thermal annealing at 130°C for 10 minutes, under the irradiation of AM 1.5G, 100 mW cm<sup>-2</sup>.

| Thickness [nm] | $V_{oc}$ [V] | $J_{sc}$ [mA cm <sup>-2</sup> ] | $FF$ [%] | $PCE$ [%] |
|----------------|--------------|---------------------------------|----------|-----------|
| 90             | 0.769        | 14.88                           | 60.01    | 6.87      |
| 110            | 0.770        | 15.28                           | 59.25    | 6.99      |
| 125            | 0.770        | 15.                             | 57.49    | 6.80      |

**Table S5.** The device performance parameters for the OPVs based on PBDB-T:IDTODT-3 at 1:1 weight ratio with thermal annealing for 10 minutes, under the irradiation of AM 1.5G, 100 mW cm<sup>-2</sup>.

| Treatment | $V_{oc}$ [V] | $J_{sc}$ [mA cm <sup>-2</sup> ] | $FF$ [%] | $PCE$ [%] |
|-----------|--------------|---------------------------------|----------|-----------|
| as-cast   | 0.814        | 15.09                           | 51.32    | 6.31      |
| 120       | 0.800        | 17.29                           | 56.17    | 7.78      |
| 140       | 0.794        | 17.32                           | 60.63    | 8.34      |
| 160       | 0.775        | 17.28                           | 61.68    | 8.25      |

**Table S6.** Effect of the active layer thickness on the device performance parameters for the OPVs based on PBDB-T:IDTODT-3 at 1:1 weight ratio with thermal annealing at 130°C for 10 minutes, under the irradiation of AM 1.5G, 100 mW cm<sup>-2</sup>.

| Thickness [nm] | $V_{oc}$ [V] | $J_{sc}$ [mA cm <sup>-2</sup> ] | $FF$ [%] | $PCE$ [%] |
|----------------|--------------|---------------------------------|----------|-----------|
| 90             | 0.796        | 16.84                           | 61.22    | 8.21      |
| 110            | 0.794        | 17.32                           | 60.63    | 8.34      |
| 125            | 0.794        | 17.45                           | 59.42    | 8.18      |

# Part 3. NMR Charts

## Compound-12

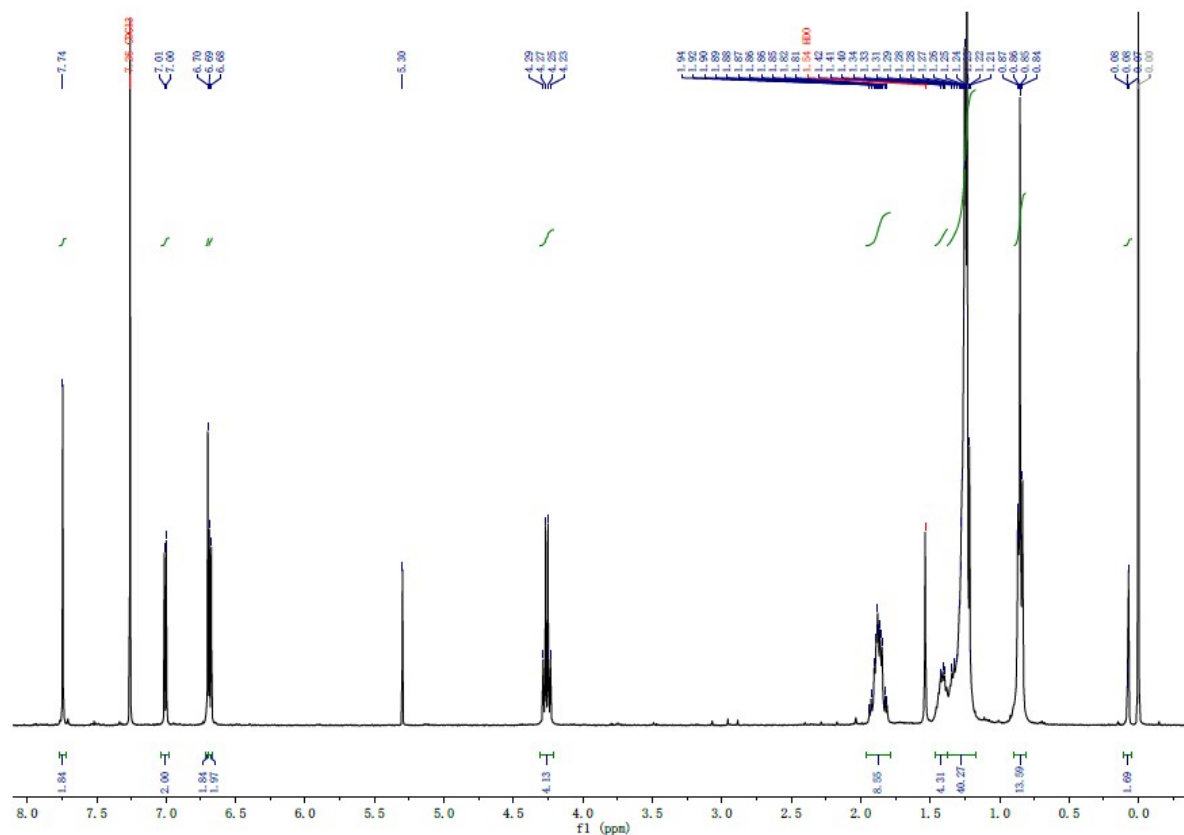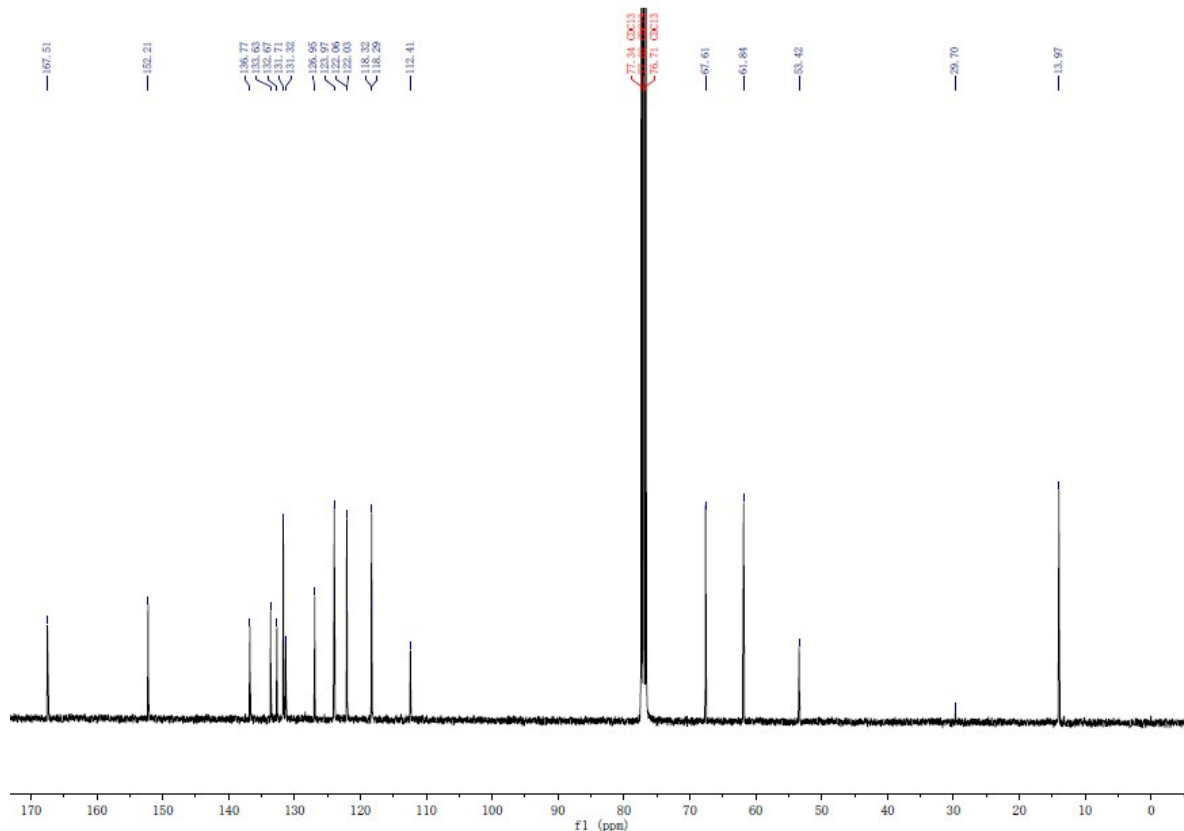

# Compound-13

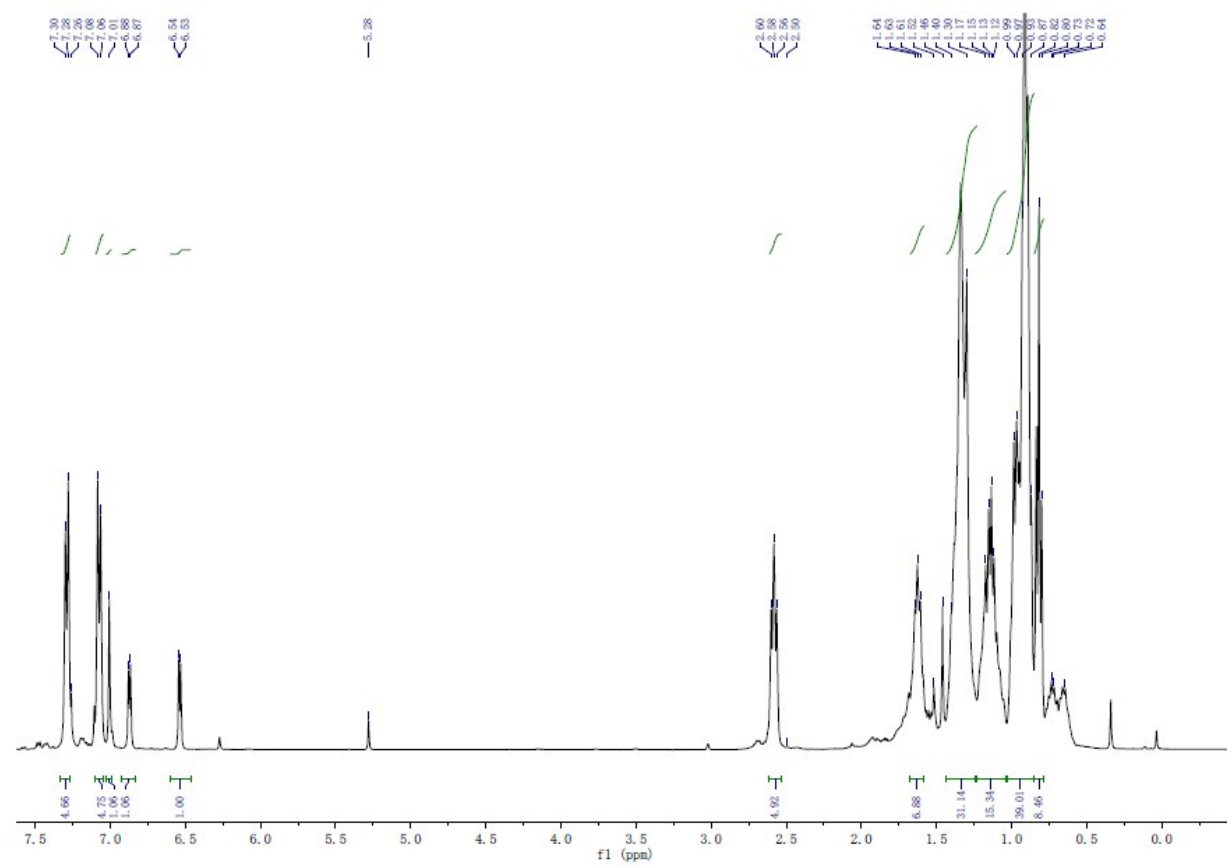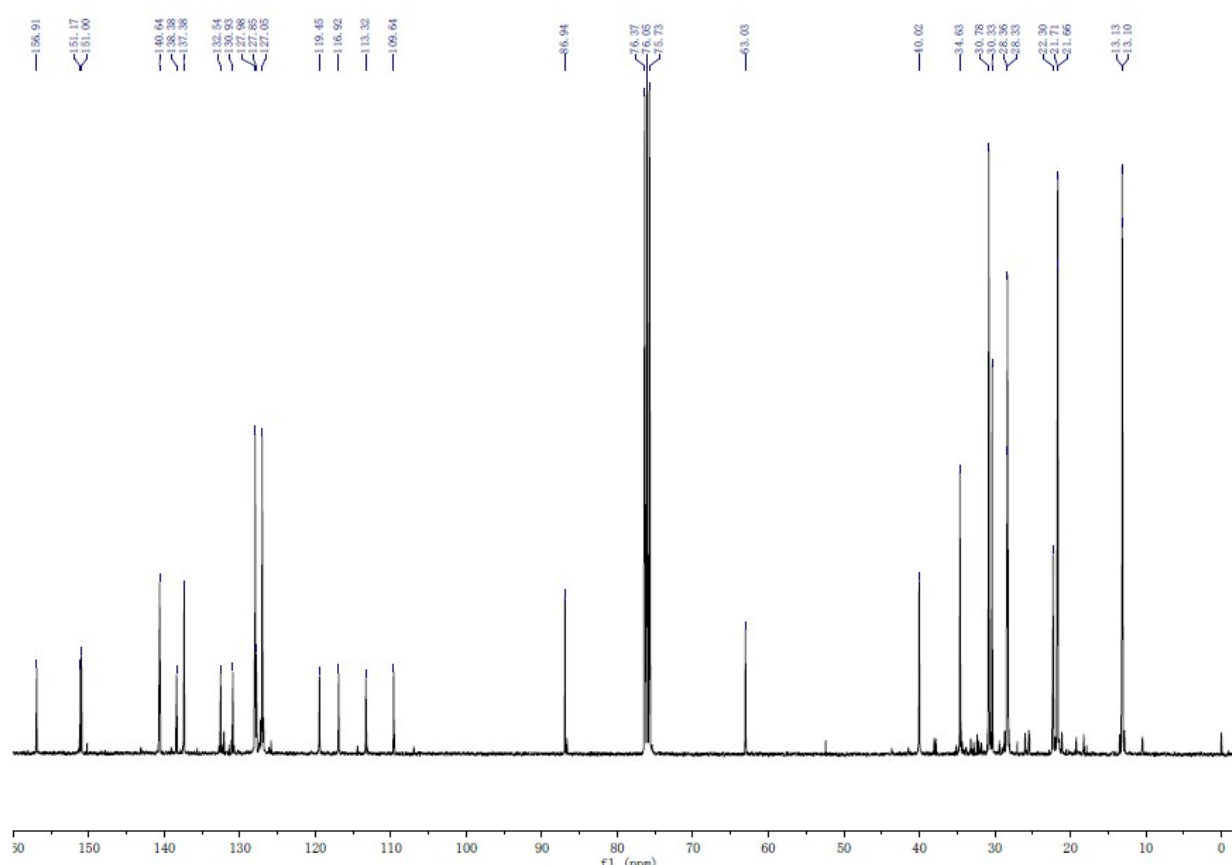

# Compound-14

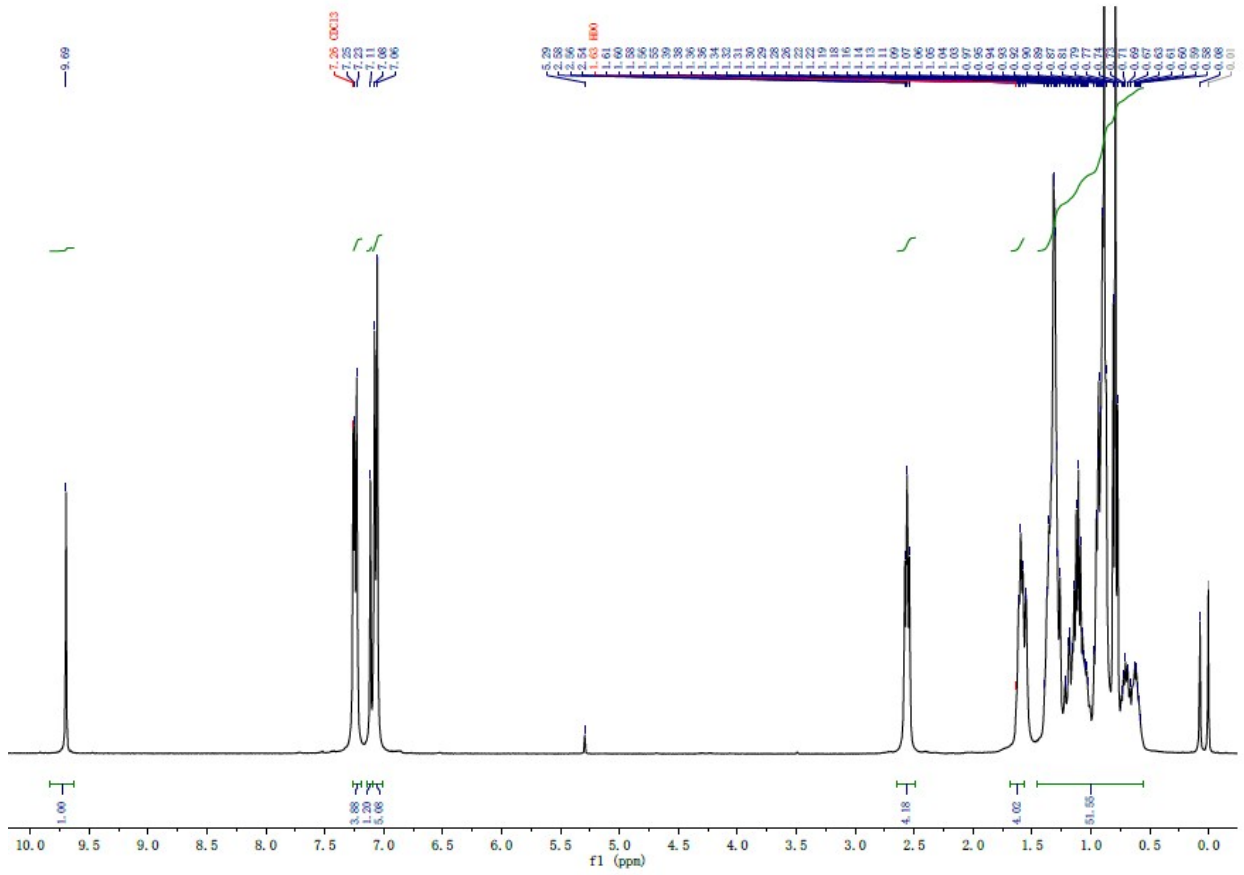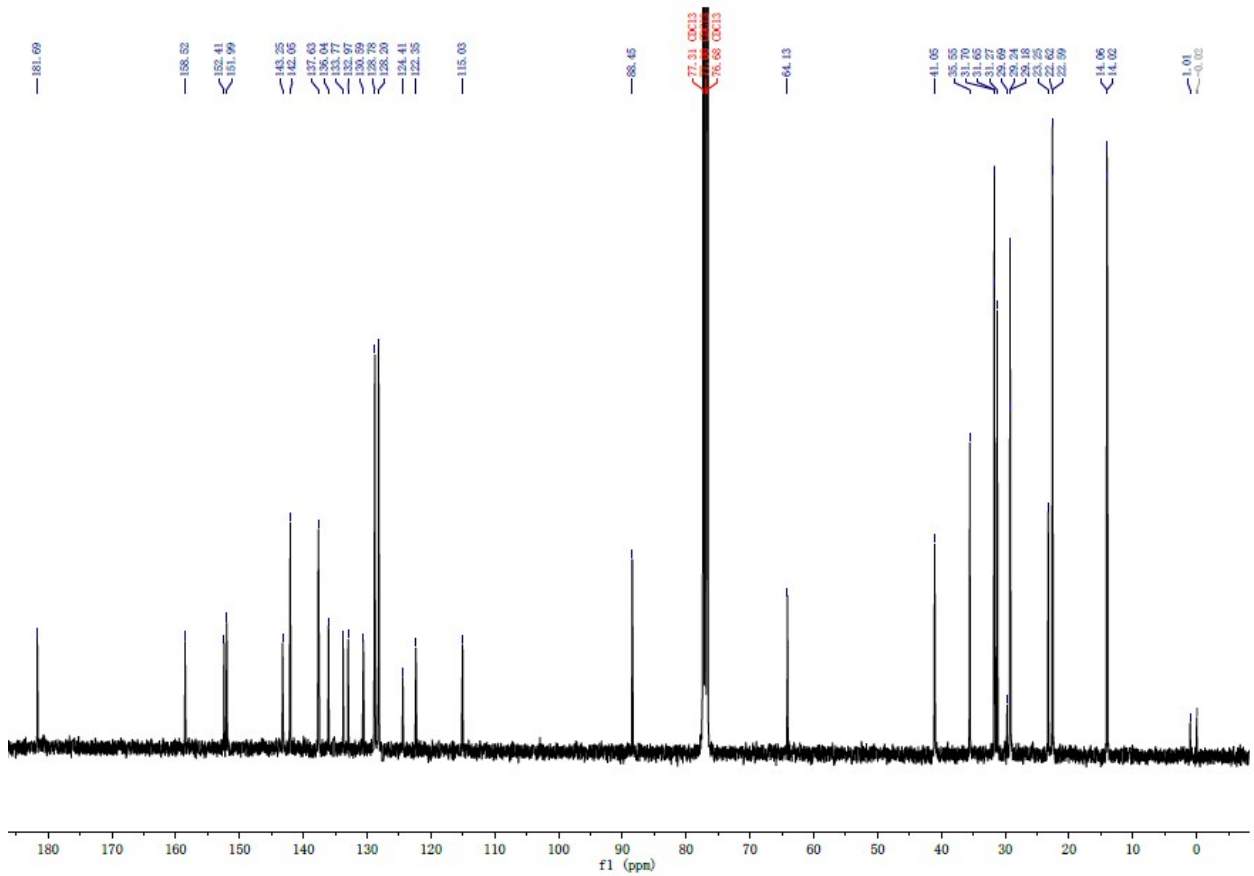



# IDTODT-1

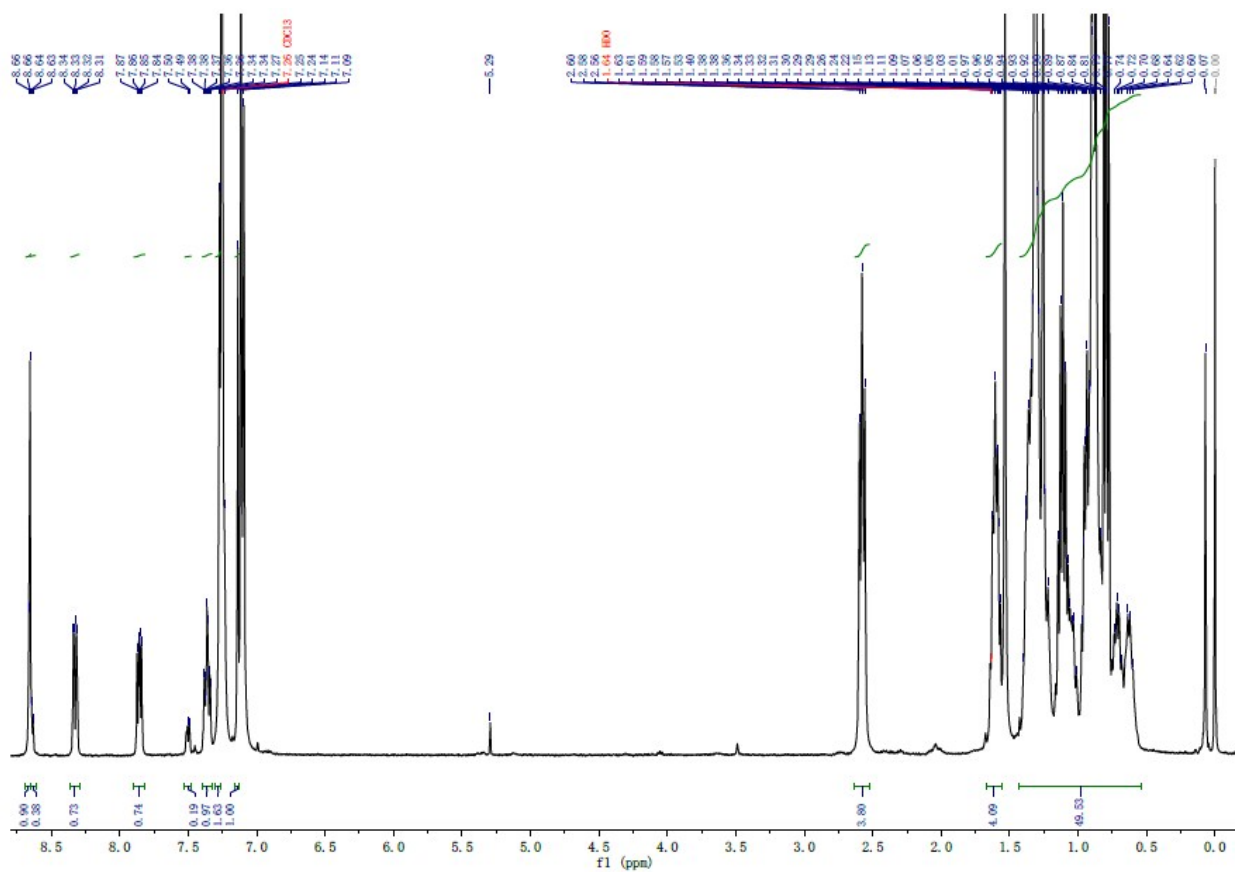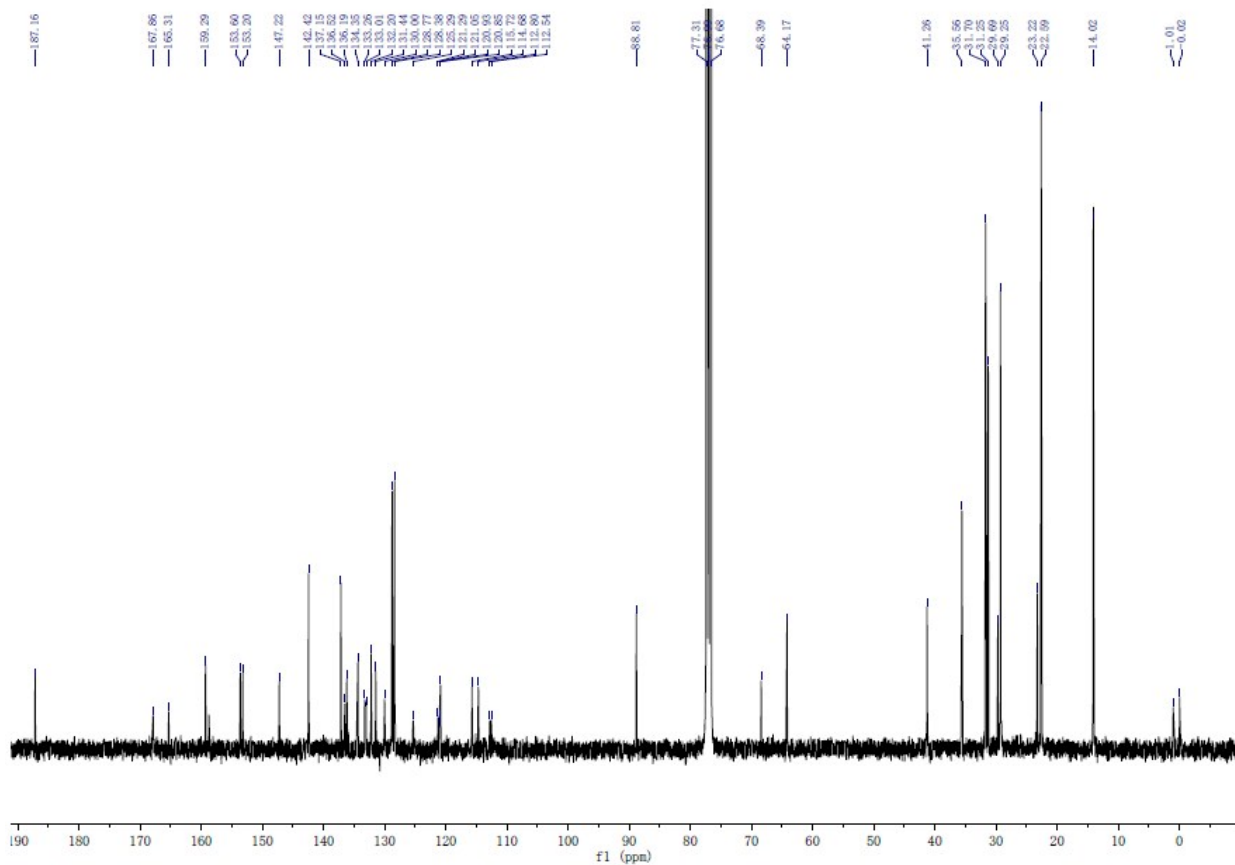

# Compound-15

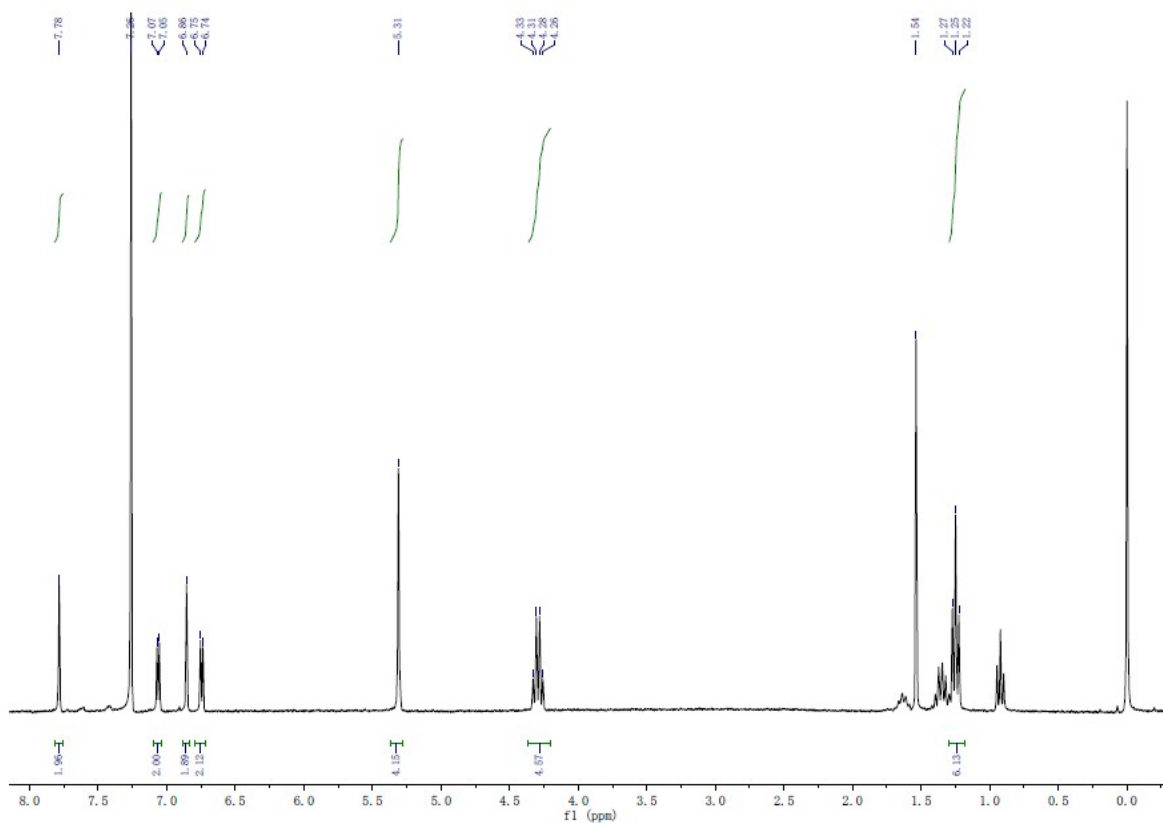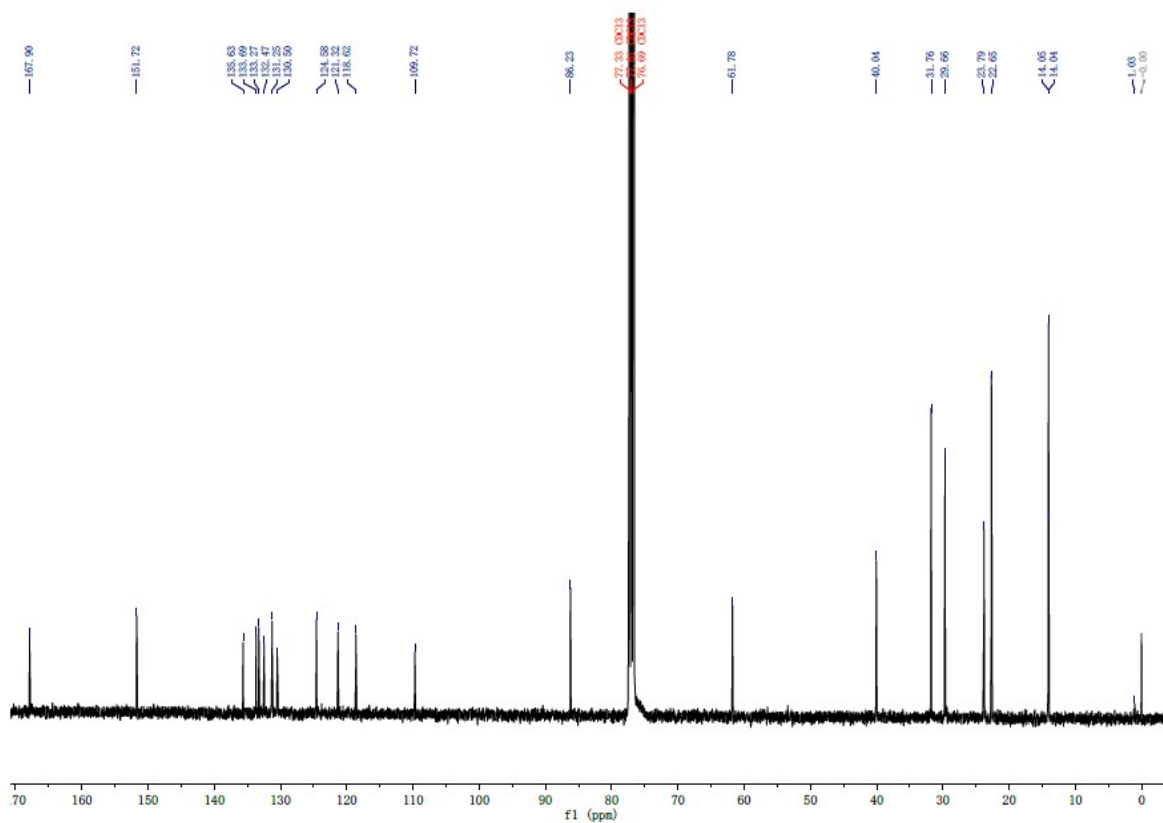

# Compound-16 (IDTODT-2)

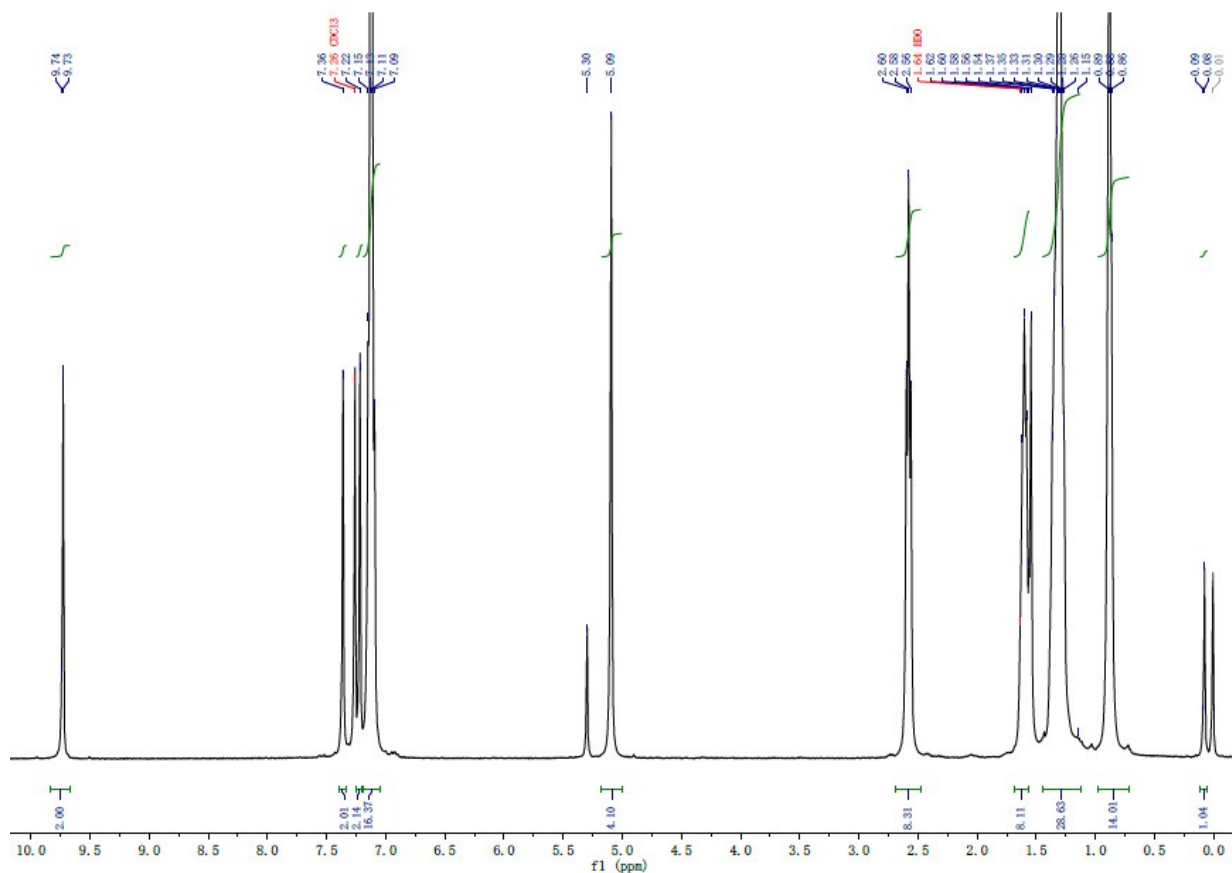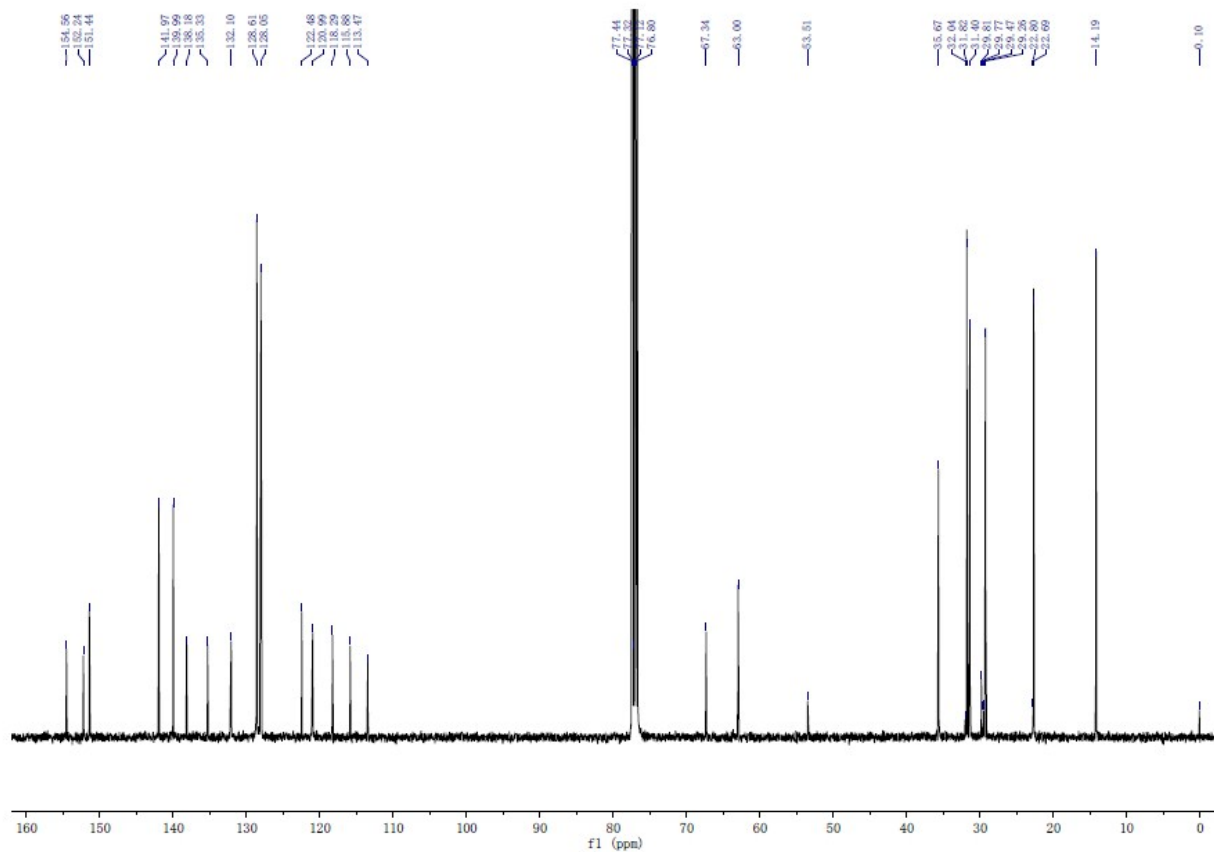

Co

mpound-16 (IDTODT-3)

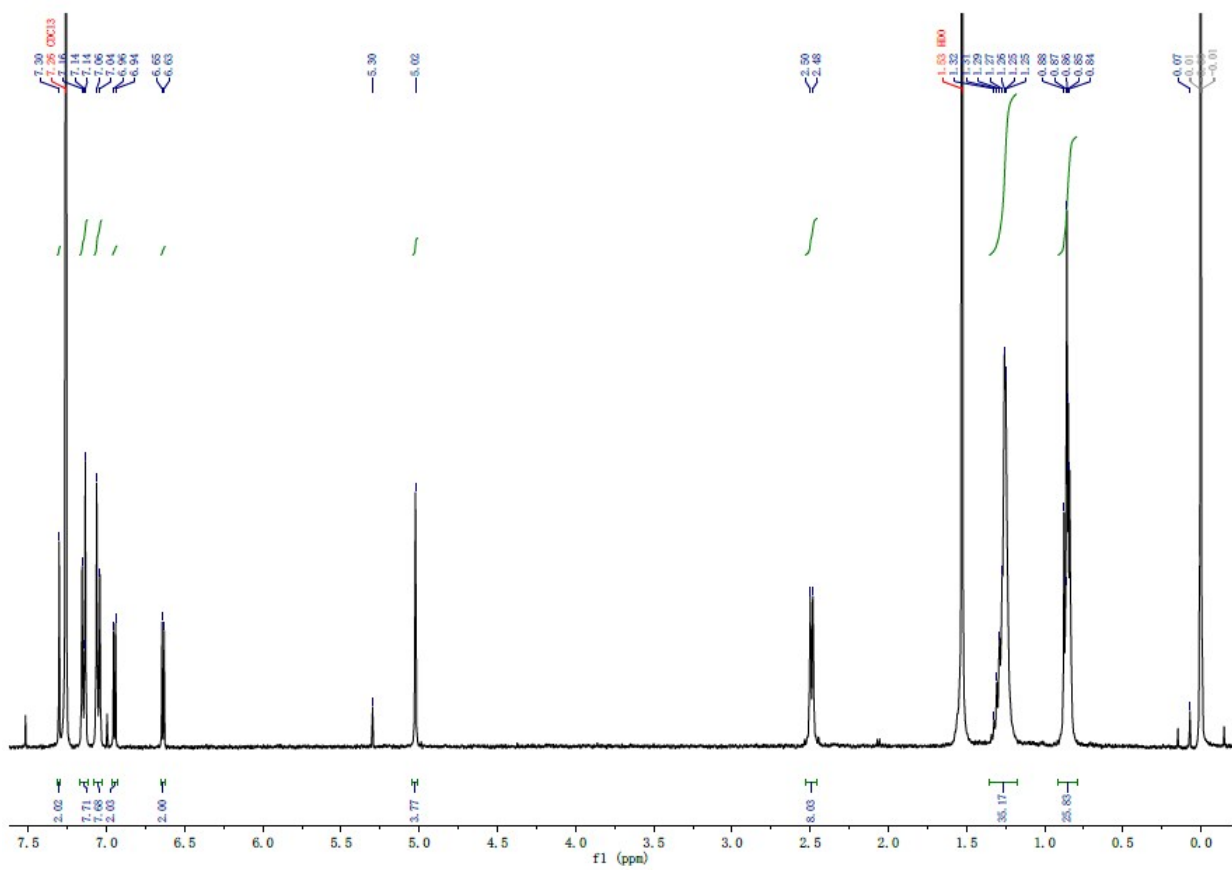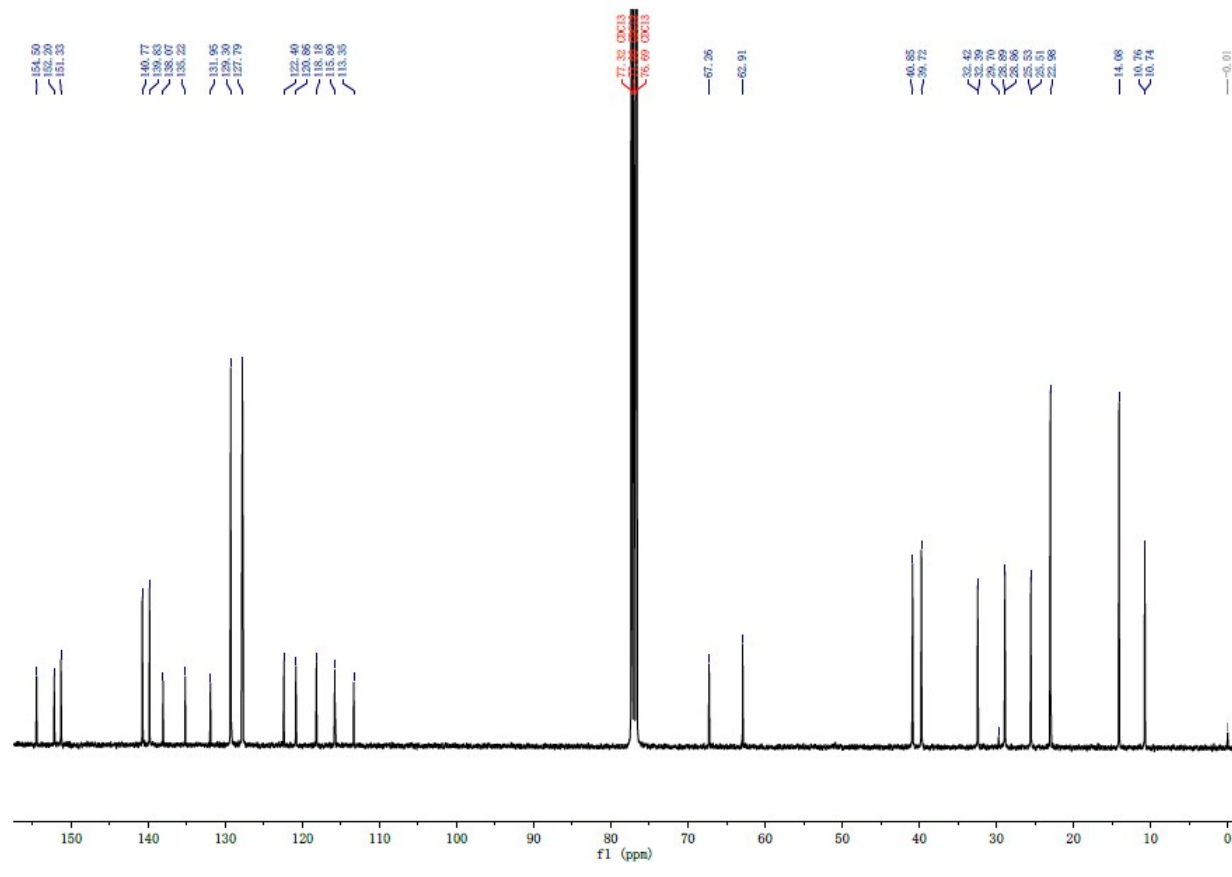

# Compound-17 (IDTODT-2)

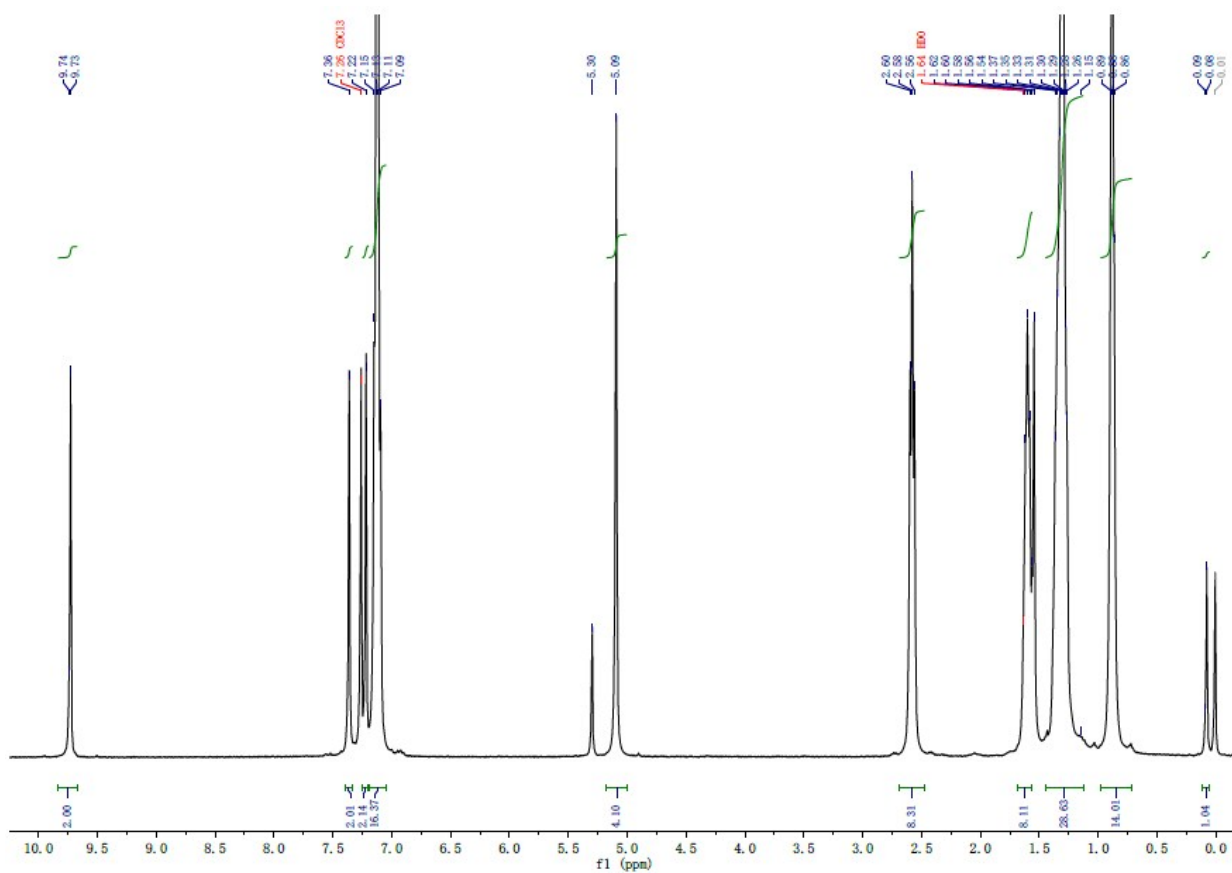

Co

**mpound-17 (IDTODT-3)**

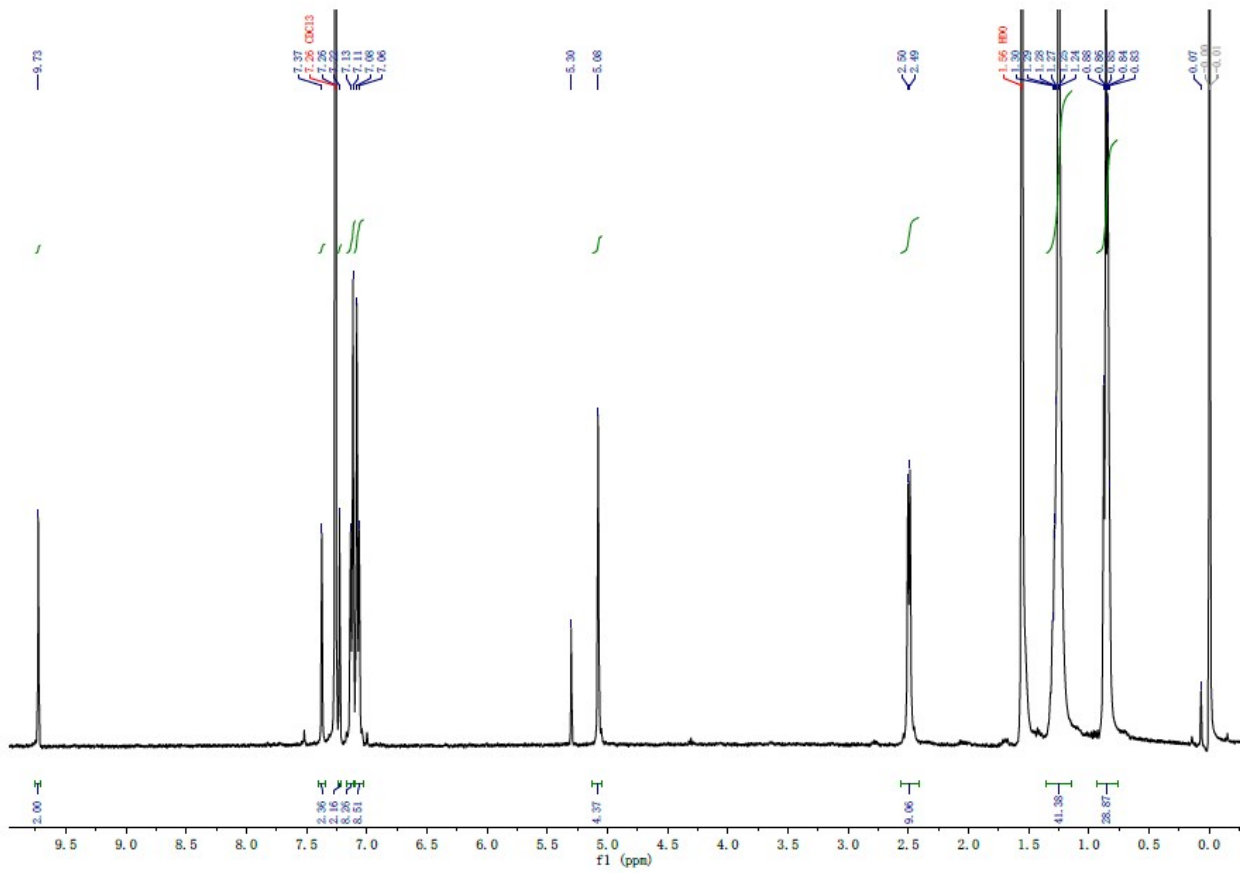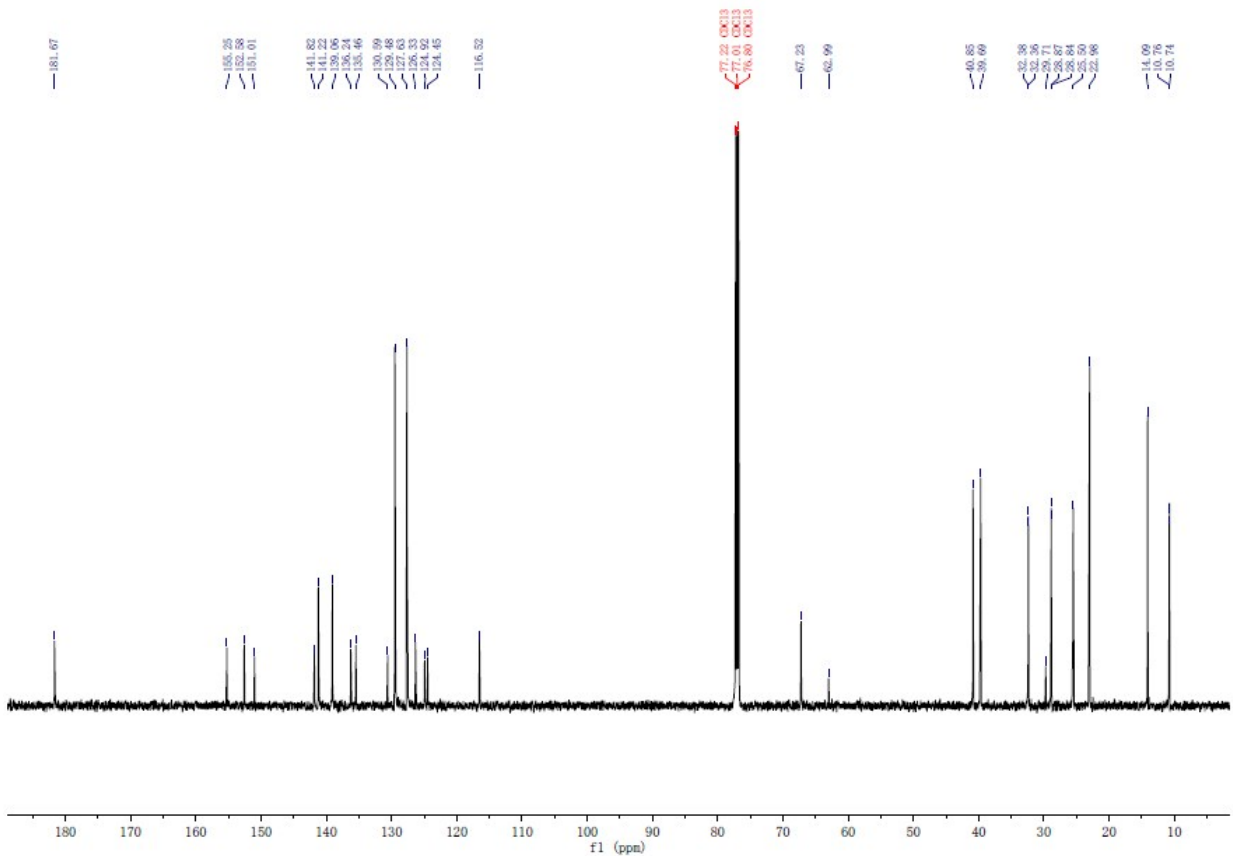

# IDTODT-2

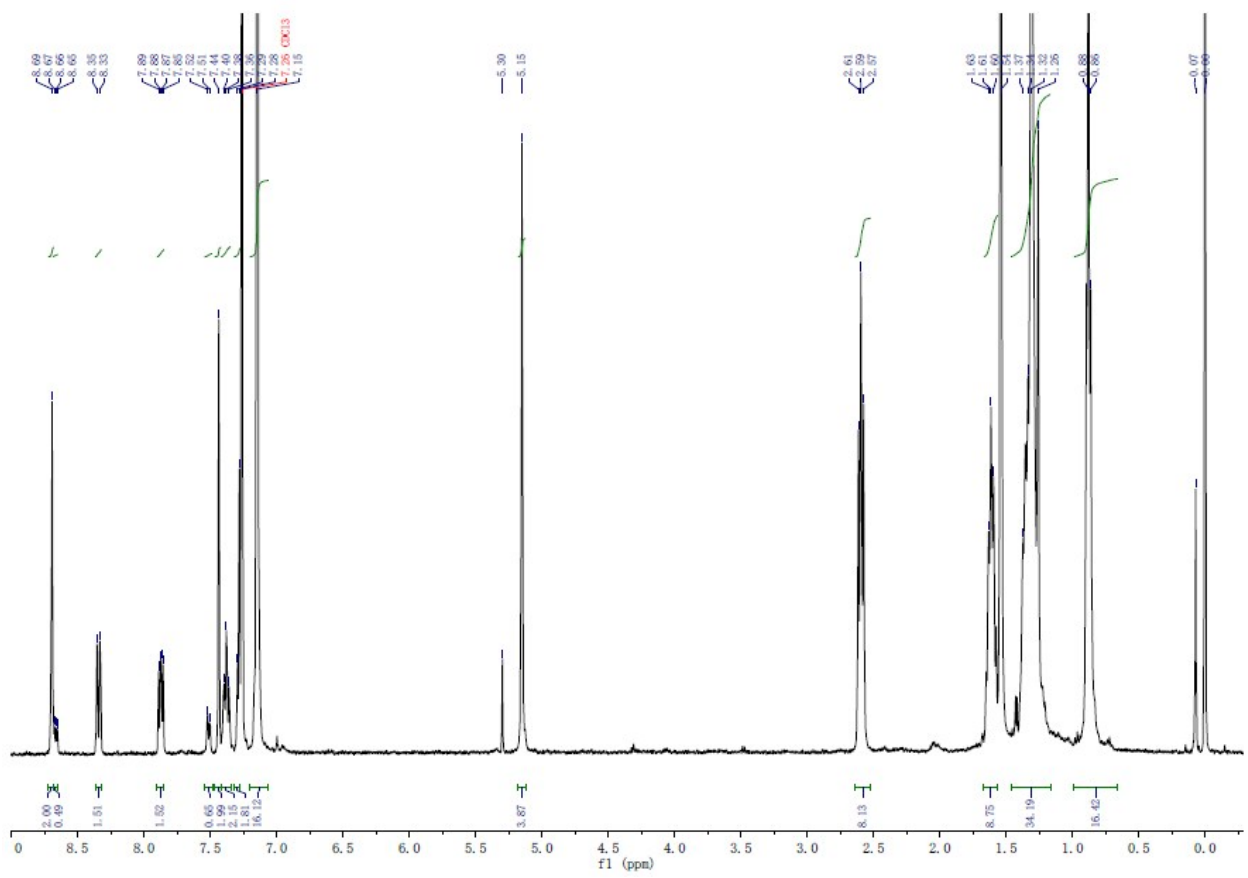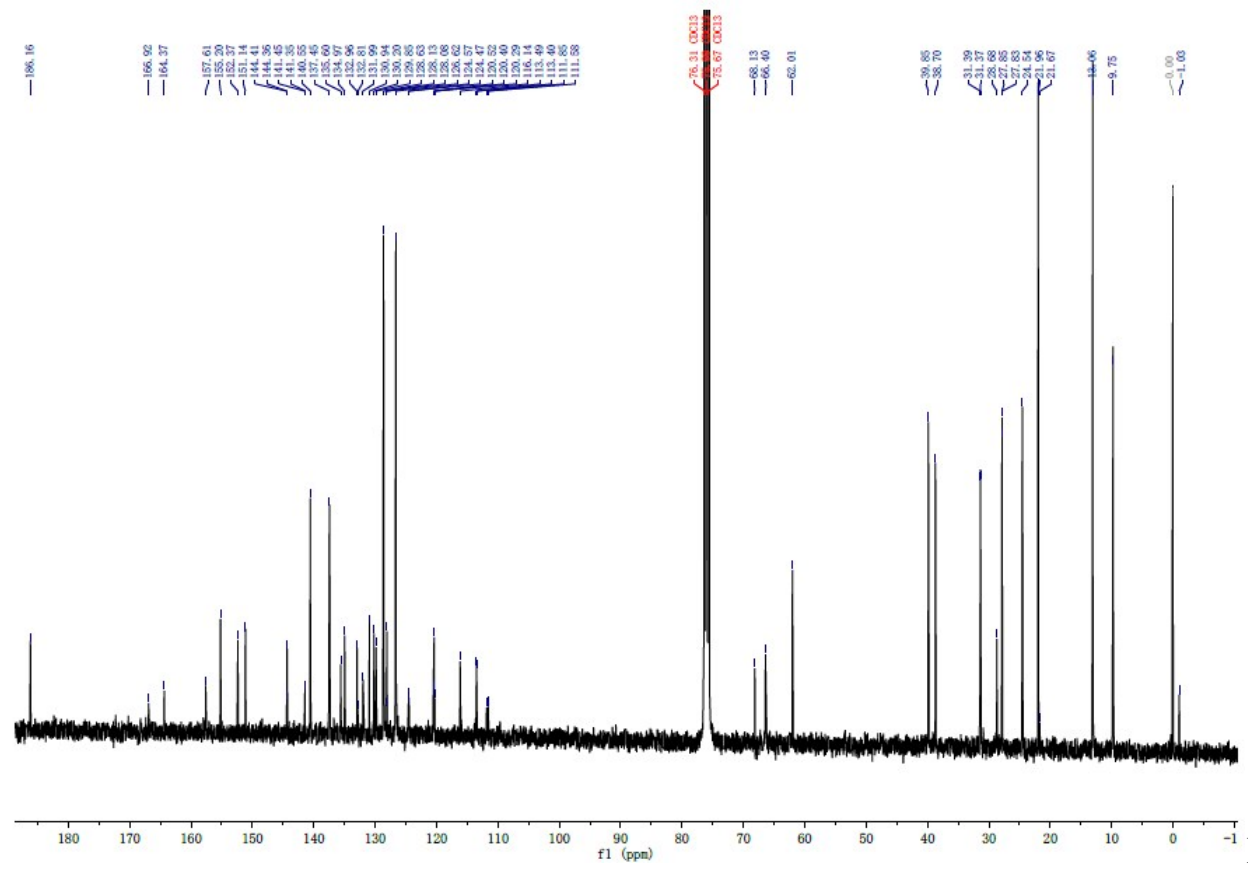

# TODT-3

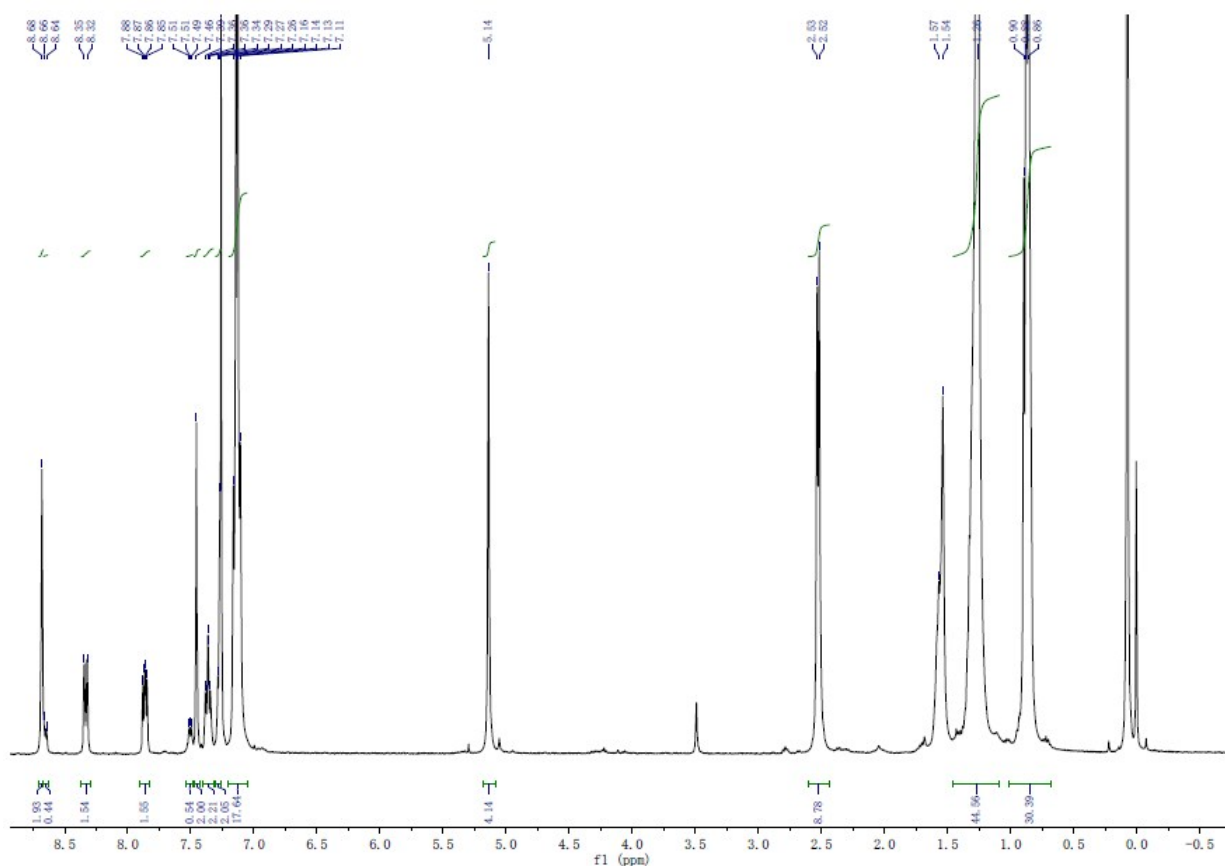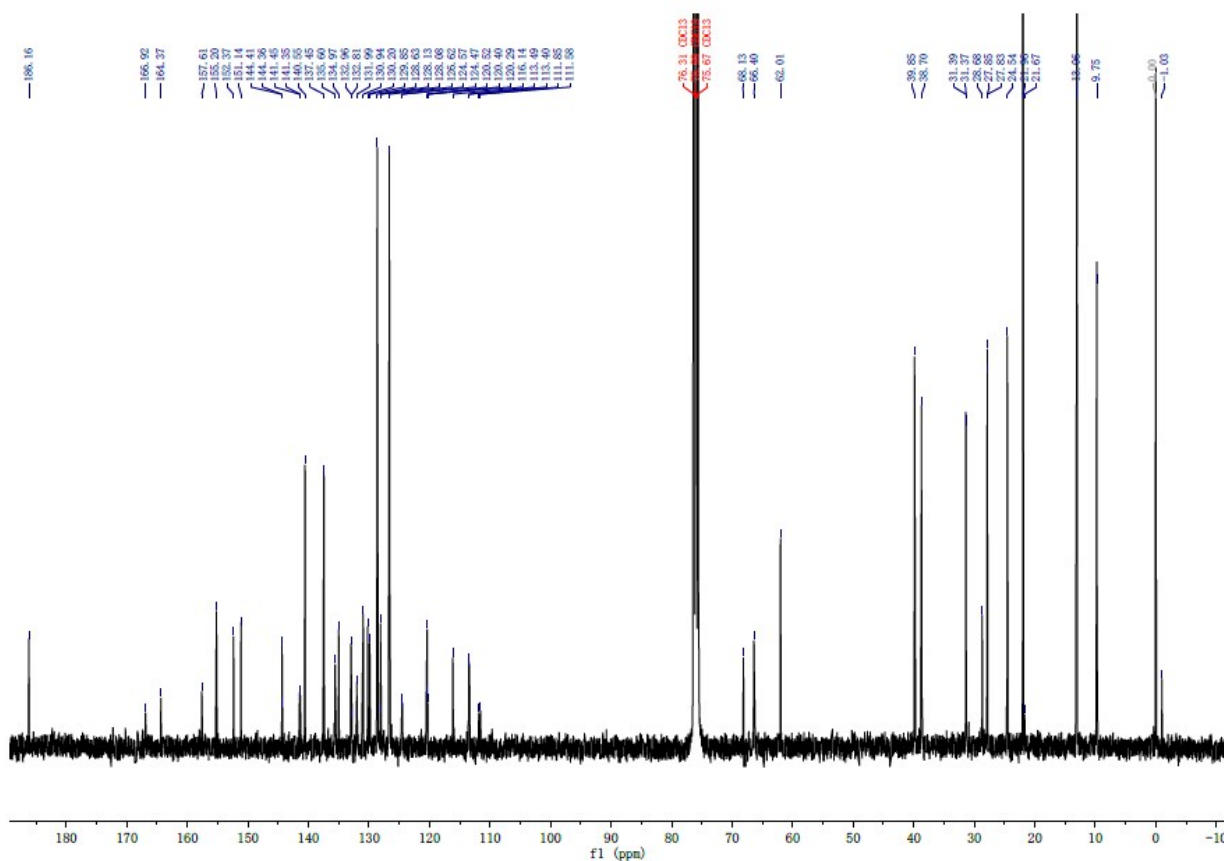



# Part 4. Mass Spectra

## IDTODT-1

### MALDI,1

#### Analysis Info

Analysis Name D:\Data\MALDI\2019\1014\1\_0\_N14\_000002.d  
 Method MALDI\_P\_100-3000  
 Sample Name MURU-N-ESI  
 Comment

Acquisition Date 10/14/2019 6:09:12 PM

Operator  
 Instrument solariX

#### Acquisition Parameter

|                       |            |                      |           |                       |                          |
|-----------------------|------------|----------------------|-----------|-----------------------|--------------------------|
| Acquisition Mode      | Single MS  | Acquired Scans       | 15        | Calibration Date      | Mon Oct 14 05:58:34      |
| Polarity              | Positive   | No. of Cell Fills    | 1         | Data Acquisition Size | 2099152                  |
| Broadband Low Mass    | 202.1 m/z  | No. of Laser Shots   | 10        | Data Processing Size  | 4194304                  |
| Broadband High Mass   | 3800.0 m/z | Laser Power          | 11.8 lp   | Apodization           | Sine-Bell Multiplication |
| Source Accumulation   | 0.001 sec  | Laser Shot Frequency | 0.020 sec |                       |                          |
| Ion Accumulation Time | 0.300 sec  |                      |           |                       |                          |

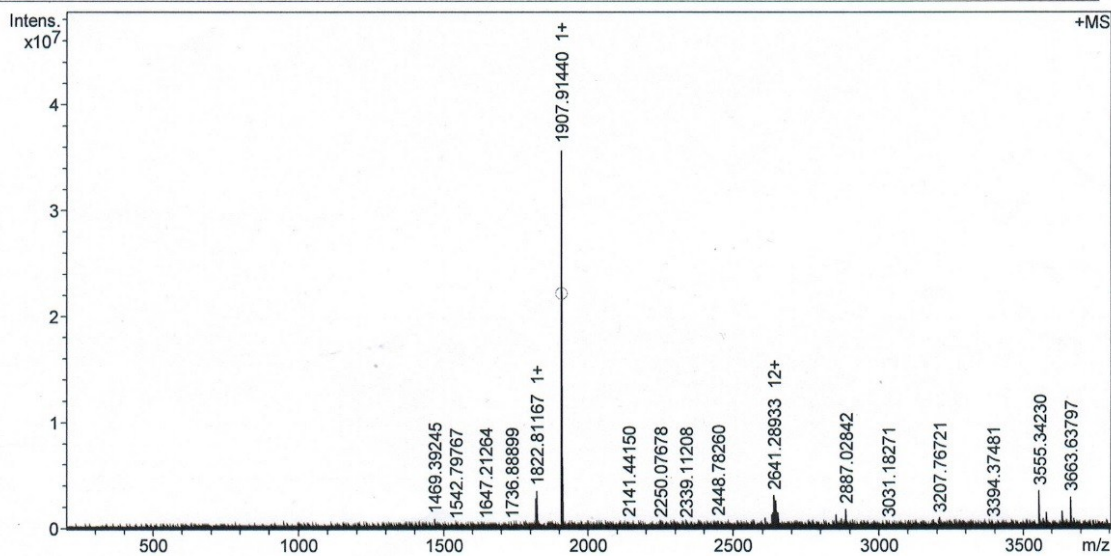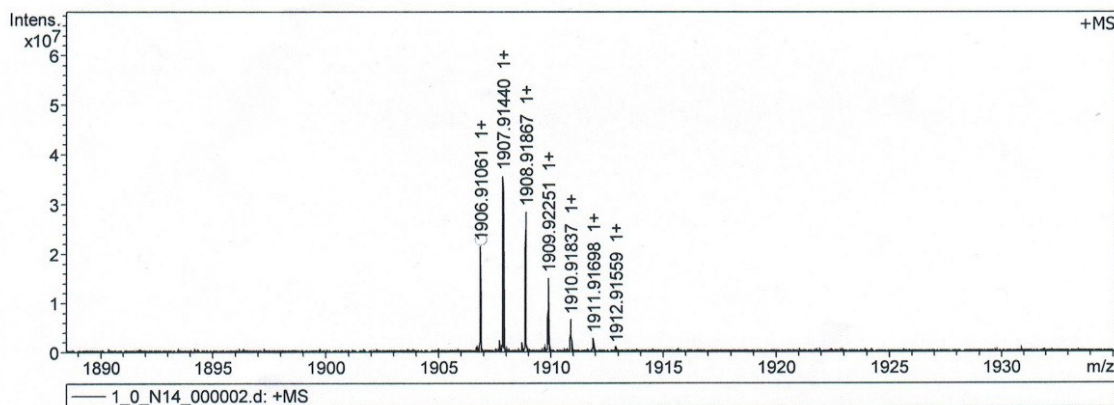

| Meas. m/z  | # | Ion Formula                                                                                 | Score  | m/z         | err [ppm] | Mean err [ppm] | mSigma | rdb  | e <sup>-</sup> Conf | N-Rule |
|------------|---|---------------------------------------------------------------------------------------------|--------|-------------|-----------|----------------|--------|------|---------------------|--------|
| 1906.91068 | 1 | C <sub>12</sub> H <sub>13</sub> F <sub>2</sub> N <sub>4</sub> O <sub>4</sub> S <sub>4</sub> | 100.00 | 1906.909401 | 0.6       | -1.6           | 55.8   | 60.0 | odd                 | ok     |

# IDTODT-2

## MALDI,2

### Analysis Info

Analysis Name D:\Data\MALDI\2019\1014\2\_0\_N15\_000001.d  
 Method MALDI\_P\_100-3000  
 Sample Name MURU-N-ESI  
 Comment

Acquisition Date 10/14/2019 6:11:16 PM

Operator

Instrument solarix

### Acquisition Parameter

|                       |            |                      |           |                       |                          |
|-----------------------|------------|----------------------|-----------|-----------------------|--------------------------|
| Acquisition Mode      | Single MS  | Acquired Scans       | 14        | Calibration Date      | Mon Oct 14 05:58:34      |
| Polarity              | Positive   | No. of Cell Fills    | 1         | Data Acquisition Size | 2099152                  |
| Broadband Low Mass    | 202.1 m/z  | No. of Laser Shots   | 10        | Data Processing Size  | 4194304                  |
| Broadband High Mass   | 3000.0 m/z | Laser Power          | 16.0 lp   | Apodization           | Sine-Bell Multiplication |
| Source Accumulation   | 0.001 sec  | Laser Shot Frequency | 0.020 sec |                       |                          |
| Ion Accumulation Time | 0.300 sec  |                      |           |                       |                          |

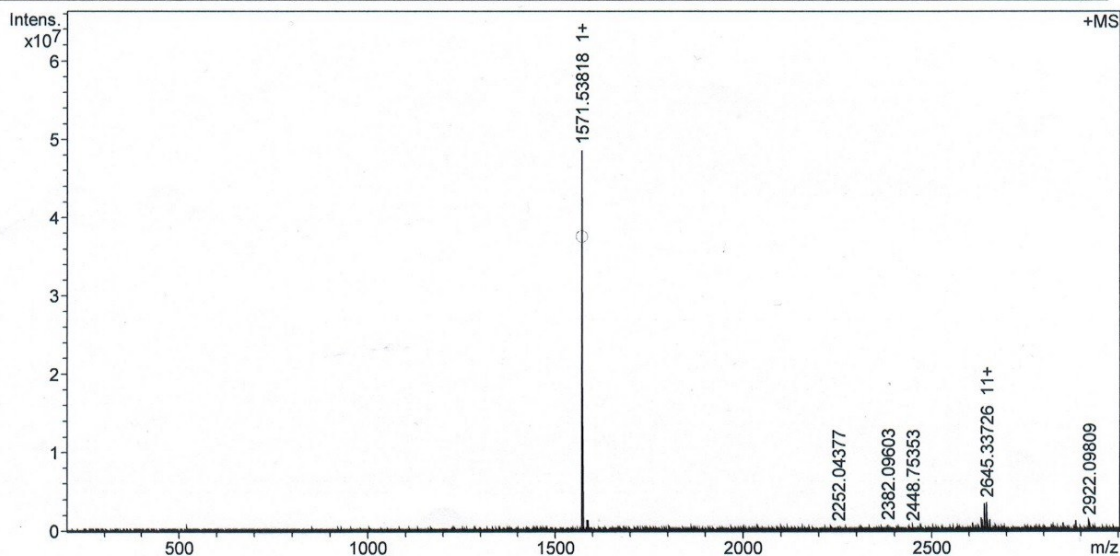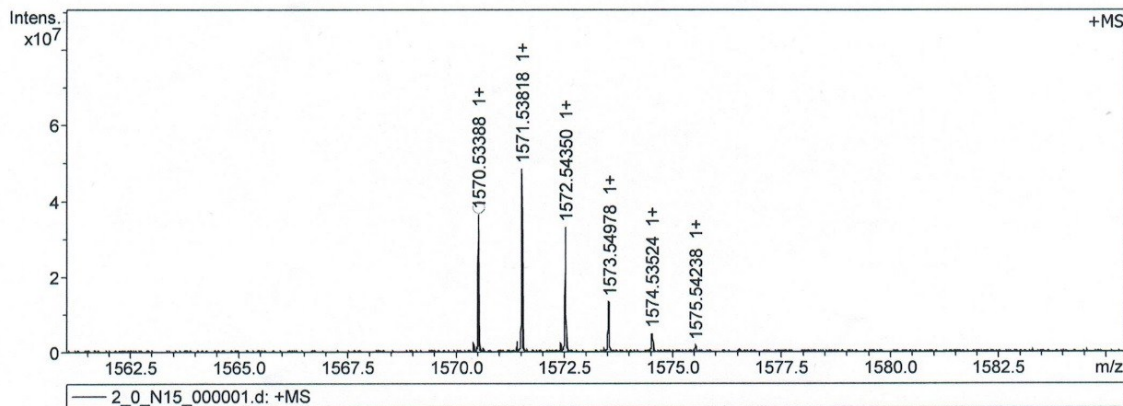

| Meas. m/z   | # | Ion Formula     | Score  | m/z         | err [ppm] | Mean err [ppm] | mSigma | rdb  | e <sup>-</sup> Conf | N-Rule |
|-------------|---|-----------------|--------|-------------|-----------|----------------|--------|------|---------------------|--------|
| 1570.533885 | 1 | C100H84F2N4O4S4 | 100.00 | 1570.533799 | 0.1       | -1.2           | 149.9  | 60.0 | odd                 | ok     |

# IDTODT-3

## MALDI,3

### Analysis Info

Analysis Name D:\Data\MALDI\2019\1014\3\_0\_N16\_000001.d  
 Method MALDI\_P\_100-3000  
 Sample Name MURU-N-ESI  
 Comment

Acquisition Date 10/14/2019 6:13:07 PM

Operator  
 Instrument solariX

### Acquisition Parameter

|                       |            |                      |           |                       |                          |
|-----------------------|------------|----------------------|-----------|-----------------------|--------------------------|
| Acquisition Mode      | Single MS  | Acquired Scans       | 3         | Calibration Date      | Mon Oct 14 05:58:34      |
| Polarity              | Positive   | No. of Cell Fills    | 1         | Data Acquisition Size | 2099152                  |
| Broadband Low Mass    | 202.1 m/z  | No. of Laser Shots   | 10        | Data Processing Size  | 4194304                  |
| Broadband High Mass   | 3000.0 m/z | Laser Power          | 16.8 lp   | Apodization           | Sine-Bell Multiplication |
| Source Accumulation   | 0.001 sec  | Laser Shot Frequency | 0.020 sec |                       |                          |
| Ion Accumulation Time | 0.300 sec  |                      |           |                       |                          |

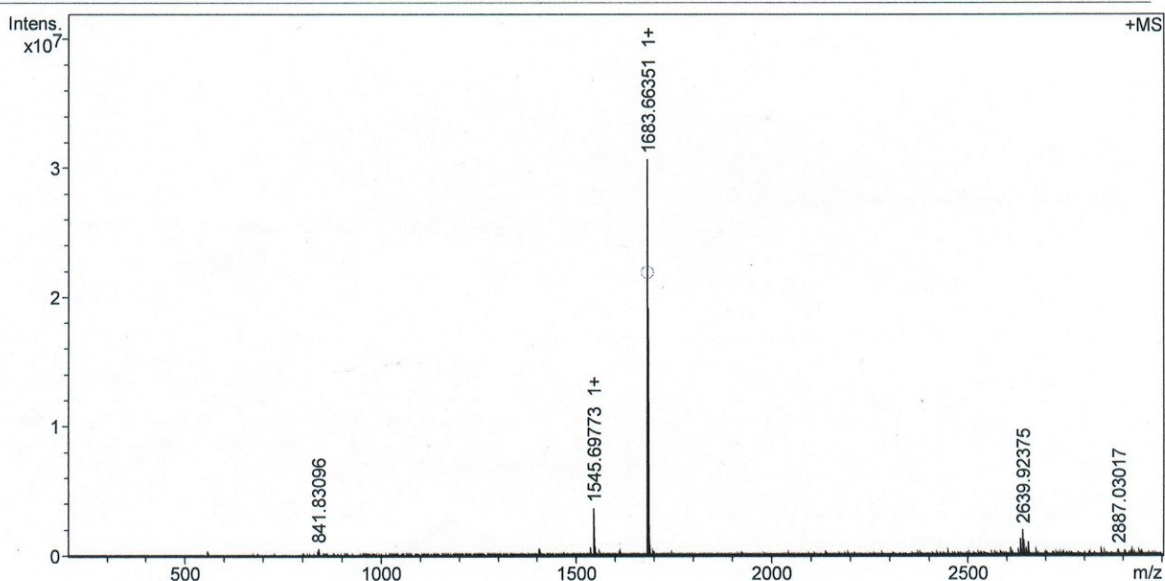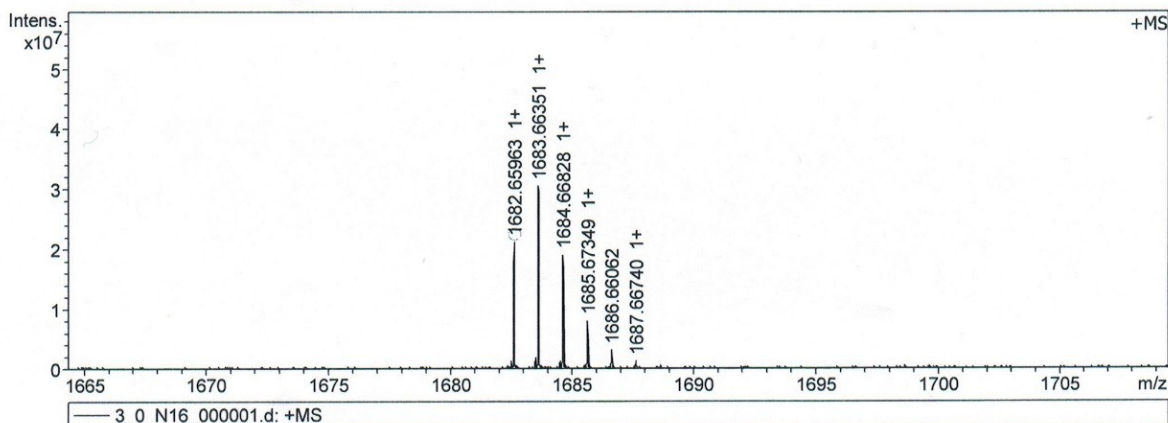

| Meas. m/z   | # | Ion Formula      | Score  | m/z         | err [ppm] | Mean err [ppm] | mSigma | rdb  | e <sup>-</sup> Conf | N-Rule |
|-------------|---|------------------|--------|-------------|-----------|----------------|--------|------|---------------------|--------|
| 1682.659630 | 1 | C108H100F2N4O4S4 | 100.00 | 1682.659000 | 0.4       | -1.5           | 91.3   | 60.0 | odd                 | ok     |
